# Supplementary material for: QUADRUPLE RELAXATION IN NUCLEAR MAGNETIC RESONANCE OF LIQUIDS
Source: Royal Society of Chemistry journal article supplement (doi:10.1039/c5dt00172b), 1956-06-01
Supplement: c5dt00172b1.pdf [file c5dt00172b1.pdf]

## Supporting Information File

# Te-Te and Te-C bond activation reactions using a monovalent Gallatediyl

*Chelladurai Ganesamoorthy, Georg Bendt, Dieter Bläser, Christoph Wölper and Stephan Schulz\**

### Content

- A)  $^1\text{H}$ ,  $^{13}\text{C}$  and  $^{125}\text{Te}$  NMR spectra of **1** - **3**
- B) IR spectra of **1** - **3**
- C) Crystallographic details of **1** - **3**

[RGa- $\mu$ -Te]<sub>2</sub> (1)

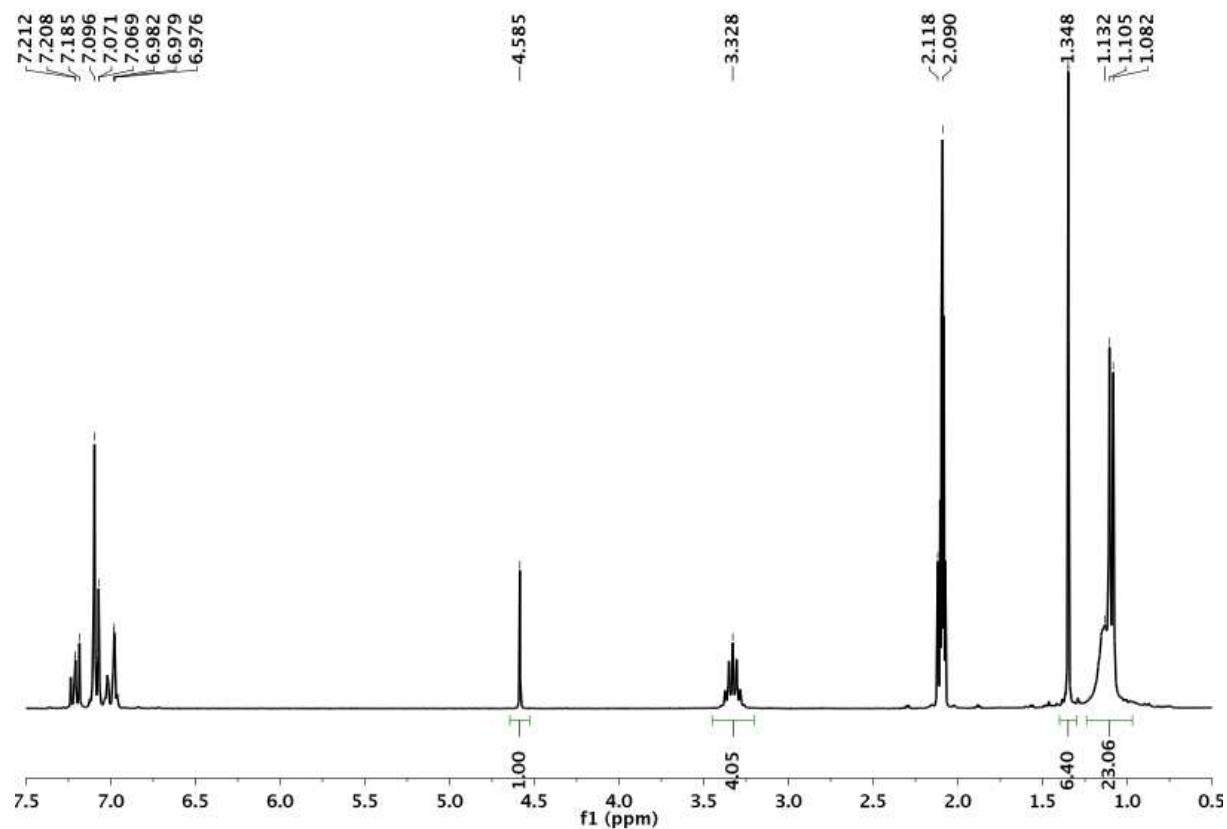

Figure S1. <sup>1</sup>H NMR spectrum of [LGa- $\mu$ -Te]<sub>2</sub> (1) in toluene-*d*<sub>8</sub>.

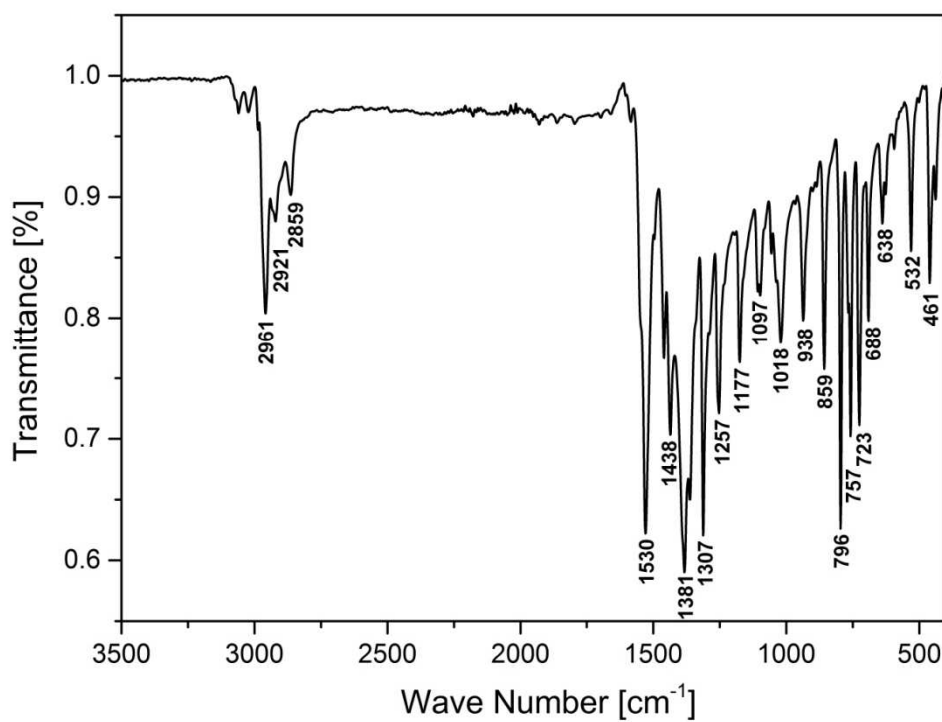

Figure S2. ATR-IR spectrum of [LGa- $\mu$ -Te]<sub>2</sub> (1).

[RGa(TePh)<sub>2</sub>] (2)

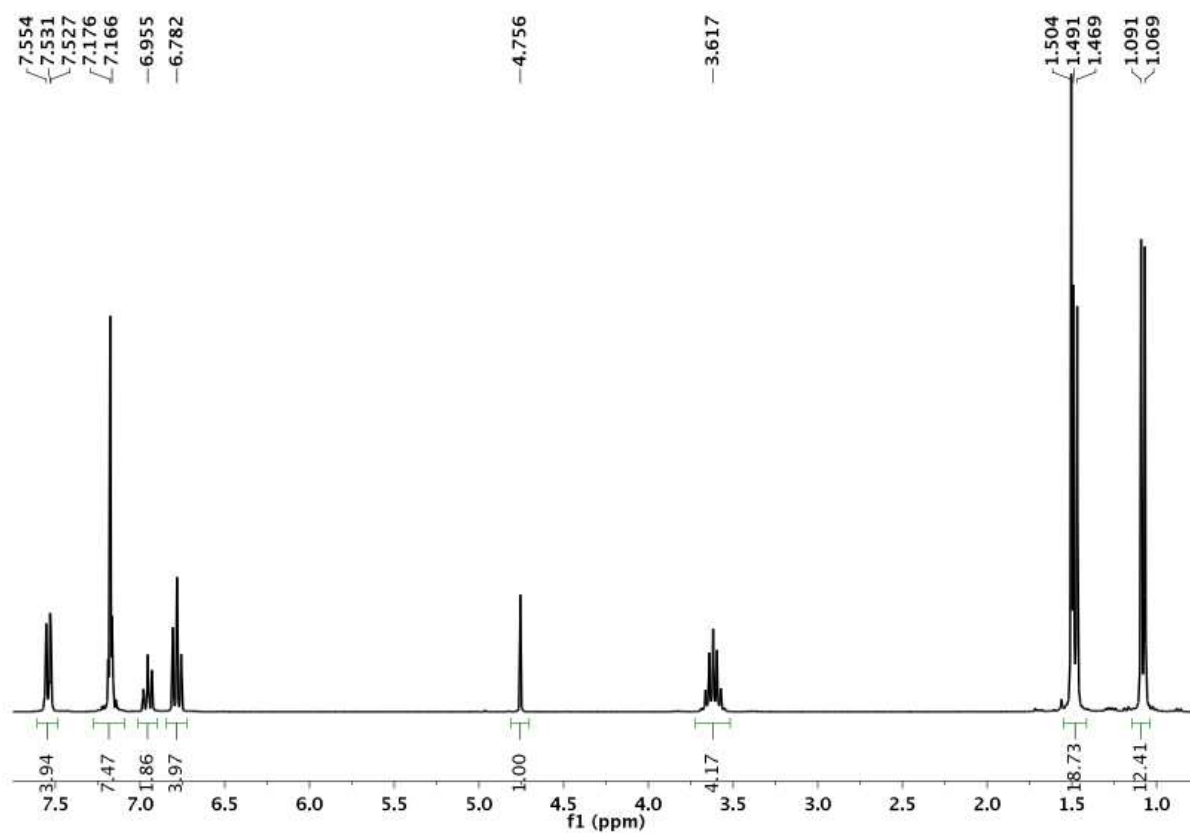

Figure S3. <sup>1</sup>H NMR spectrum of [LGa(TePh)<sub>2</sub>] (2) in C<sub>6</sub>D<sub>6</sub>.

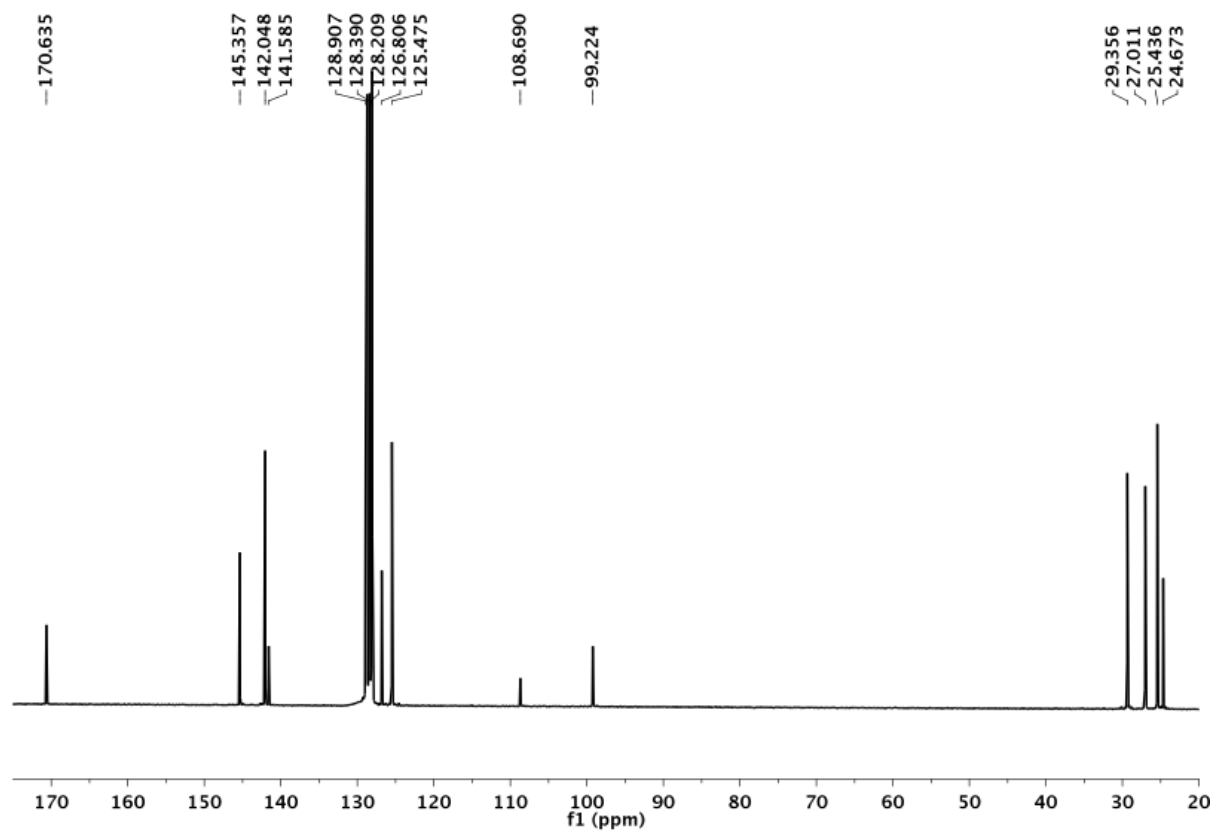

Figure S4. <sup>13</sup>C NMR spectrum of [LGa(TePh)<sub>2</sub>] (2) in C<sub>6</sub>D<sub>6</sub>.

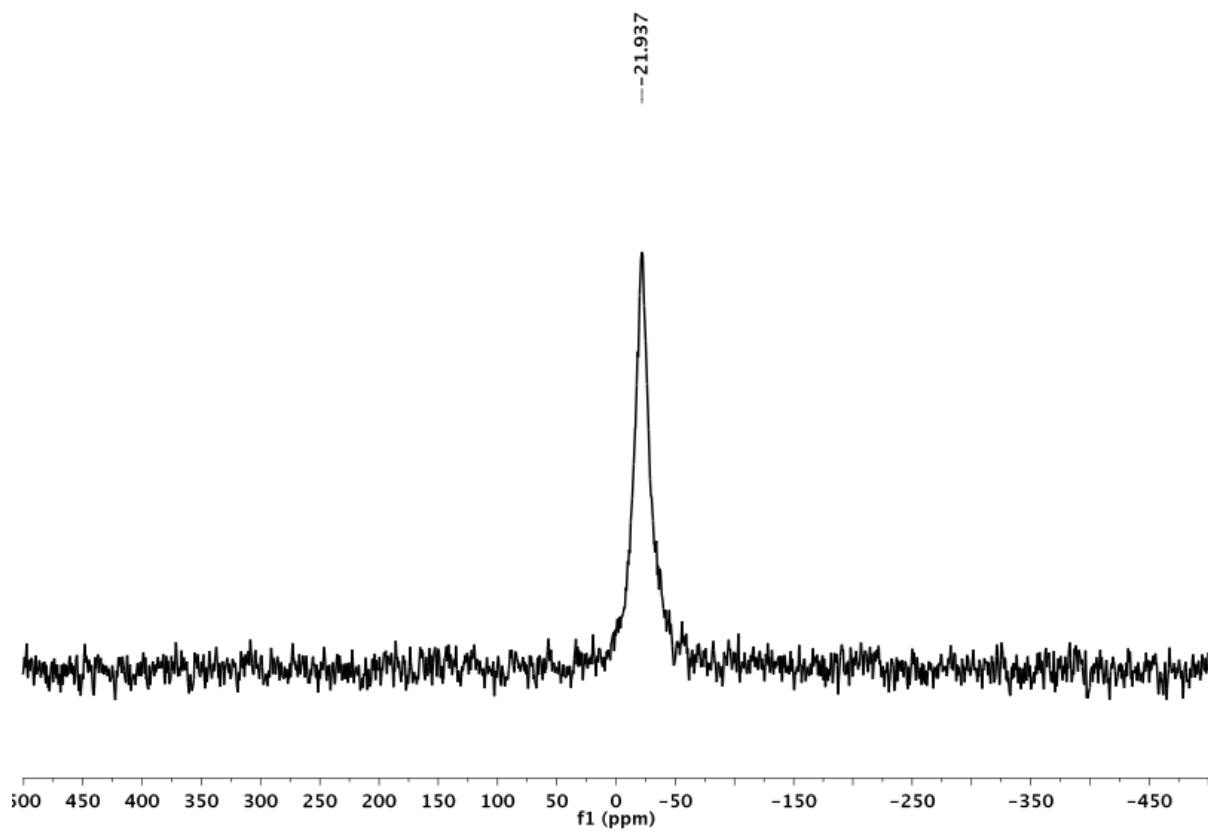

**Figure S5.**  $^{125}\text{Te}$  NMR spectrum of  $[\text{LGa}(\text{TePh})_2]$  (**2**) in  $\text{C}_6\text{D}_6$ .

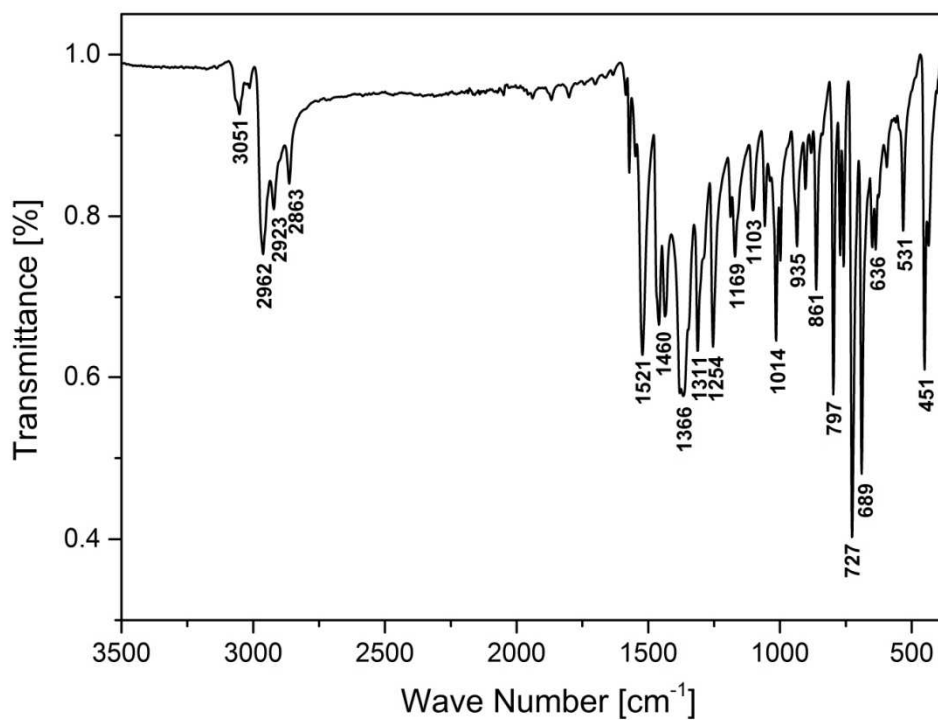

**Figure S6.** ATR-IR spectrum of  $[\text{LGa}(\text{TePh})_2]$  (**2**).

[RGa(*i*-Pr)Te-*i*-Pr] (3)

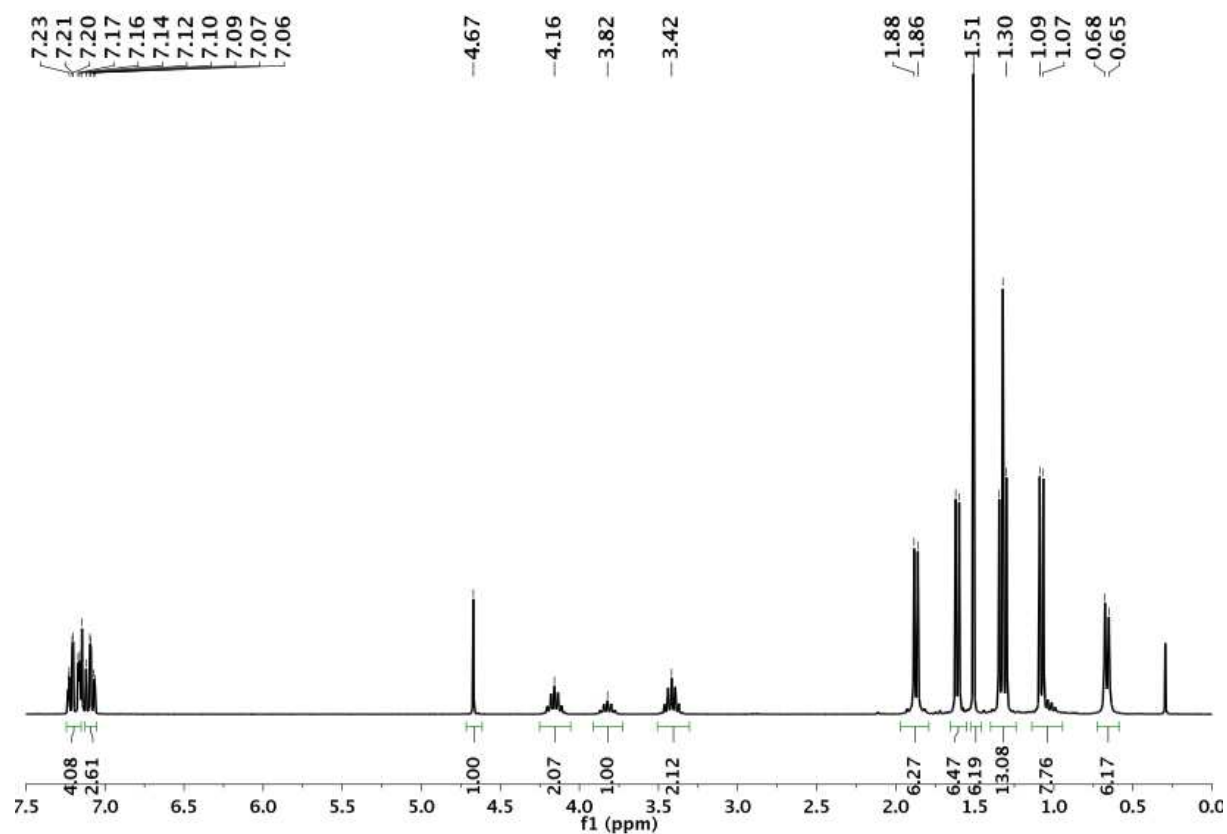

Figure S7. <sup>1</sup>H NMR spectrum of [LGa(*i*-Pr)Te-*i*-Pr] (3) in C<sub>6</sub>D<sub>6</sub>.

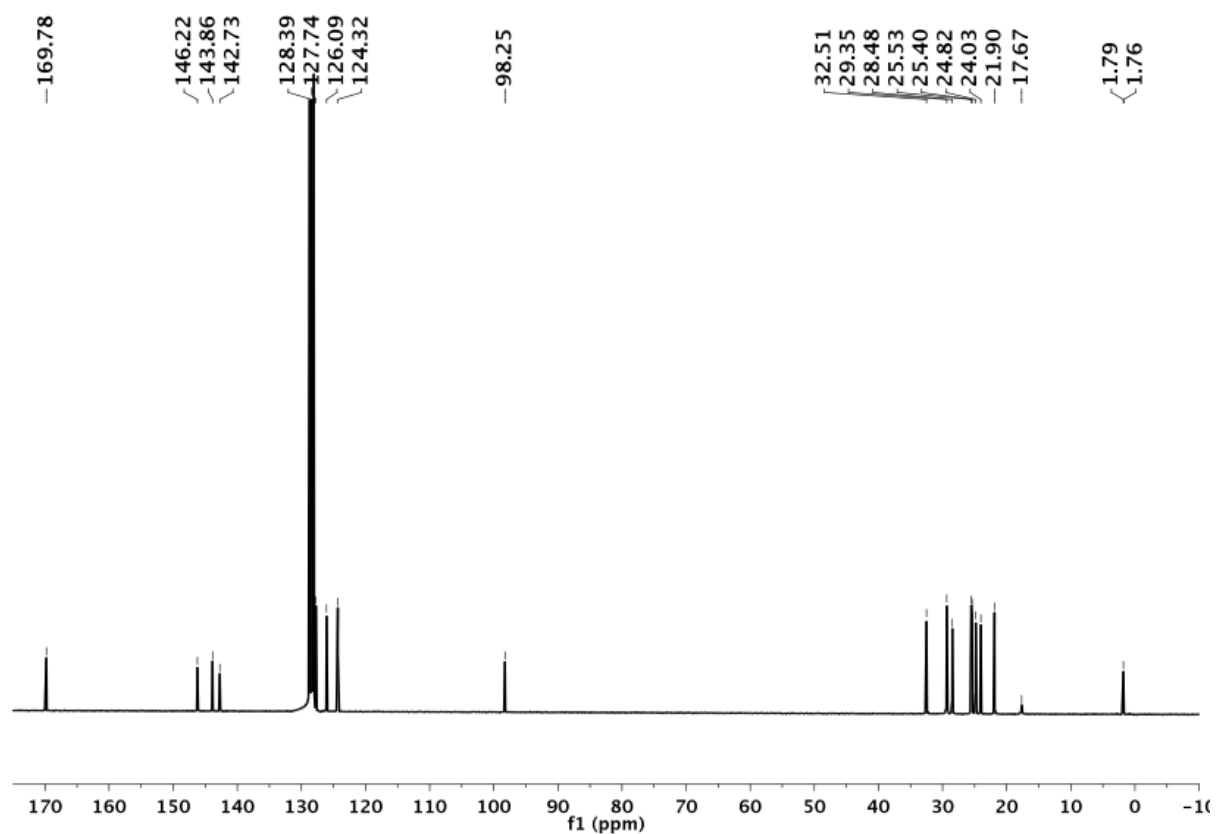

Figure S8. <sup>13</sup>C NMR spectrum of [LGa(*i*-Pr)Te-*i*-Pr] (3) in C<sub>6</sub>D<sub>6</sub>.

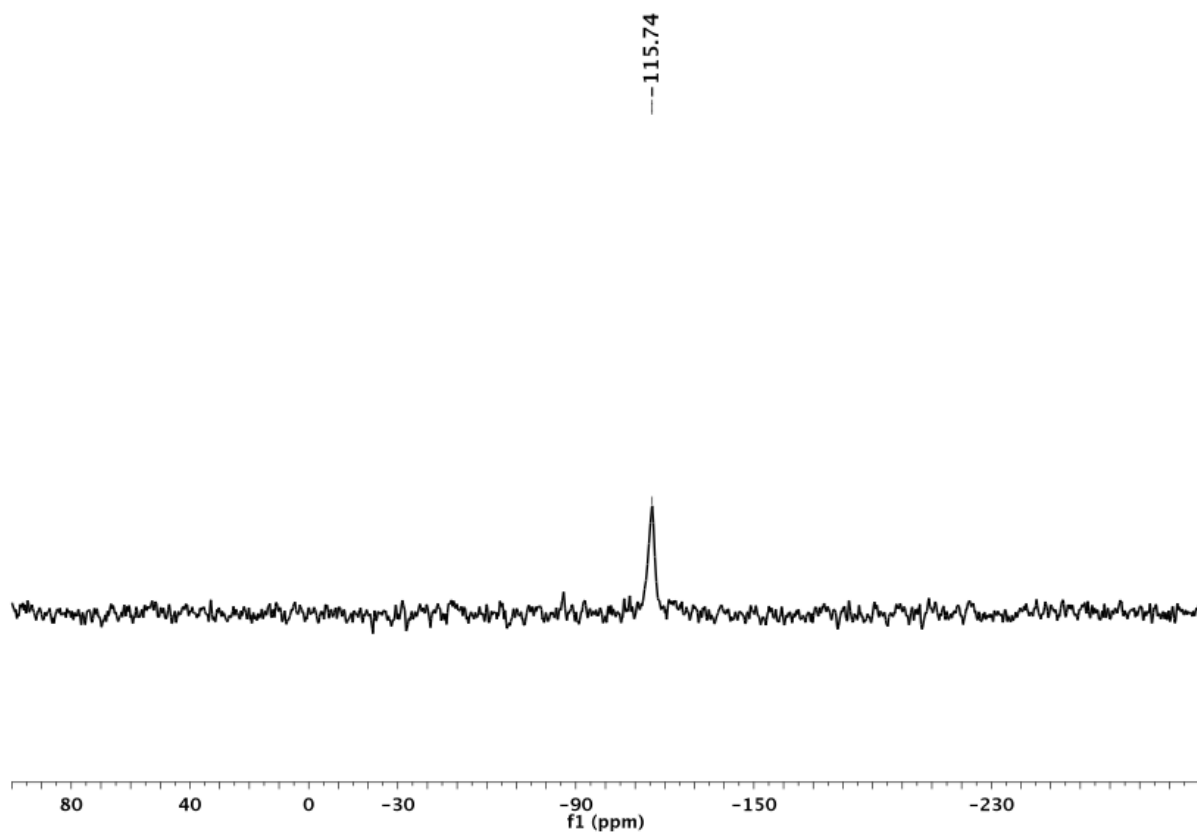

**Figure S9.**  $^{125}\text{Te}$  NMR spectrum of [LGa(*i*-Pr)Te-*i*-Pr] (3) in  $\text{C}_6\text{D}_6$ .

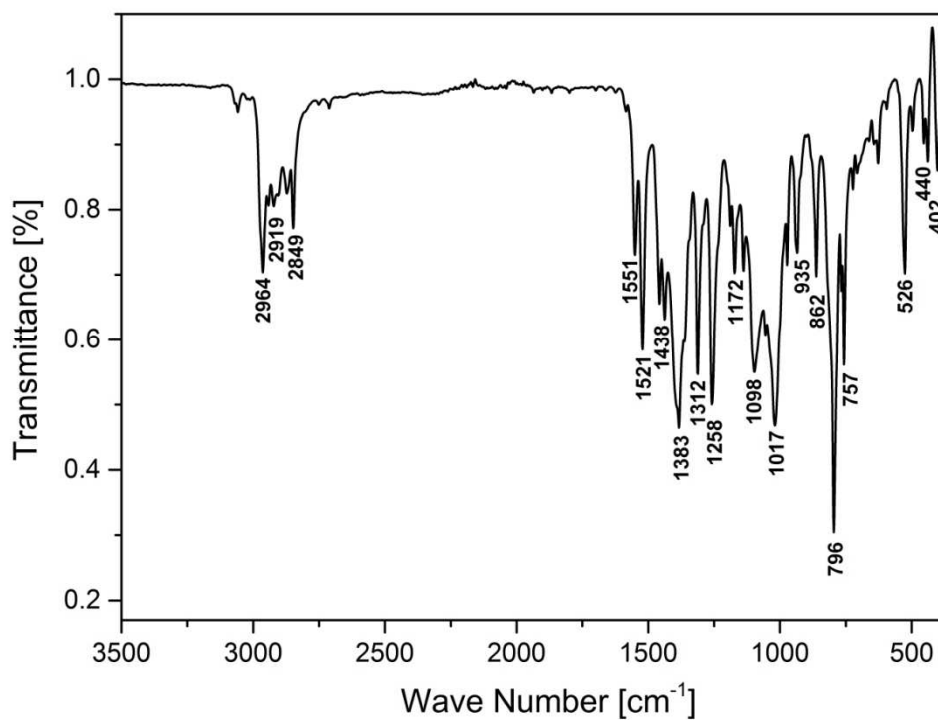

**Figure S10.** ATR-IR spectrum of [LGa(*i*-Pr)Te-*i*-Pr] (3).

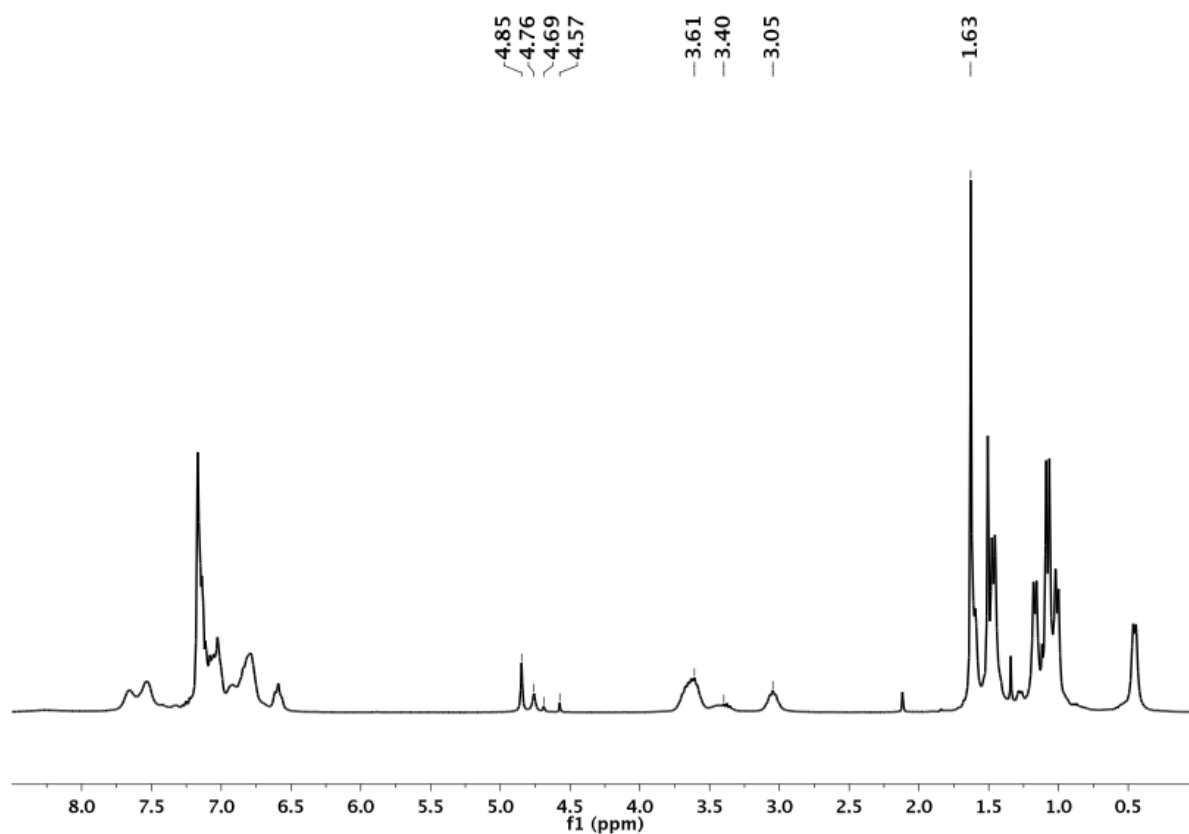

**Figure S11.**  $^1\text{H}$  NMR spectrum of the 1:1 reaction mixture of  $\text{Ph}_2\text{Te}_2$  and  $\text{LGa}\rightarrow\text{B}(\text{C}_6\text{F}_5)_3$  in  $\text{C}_6\text{D}_6$  after 3 days.

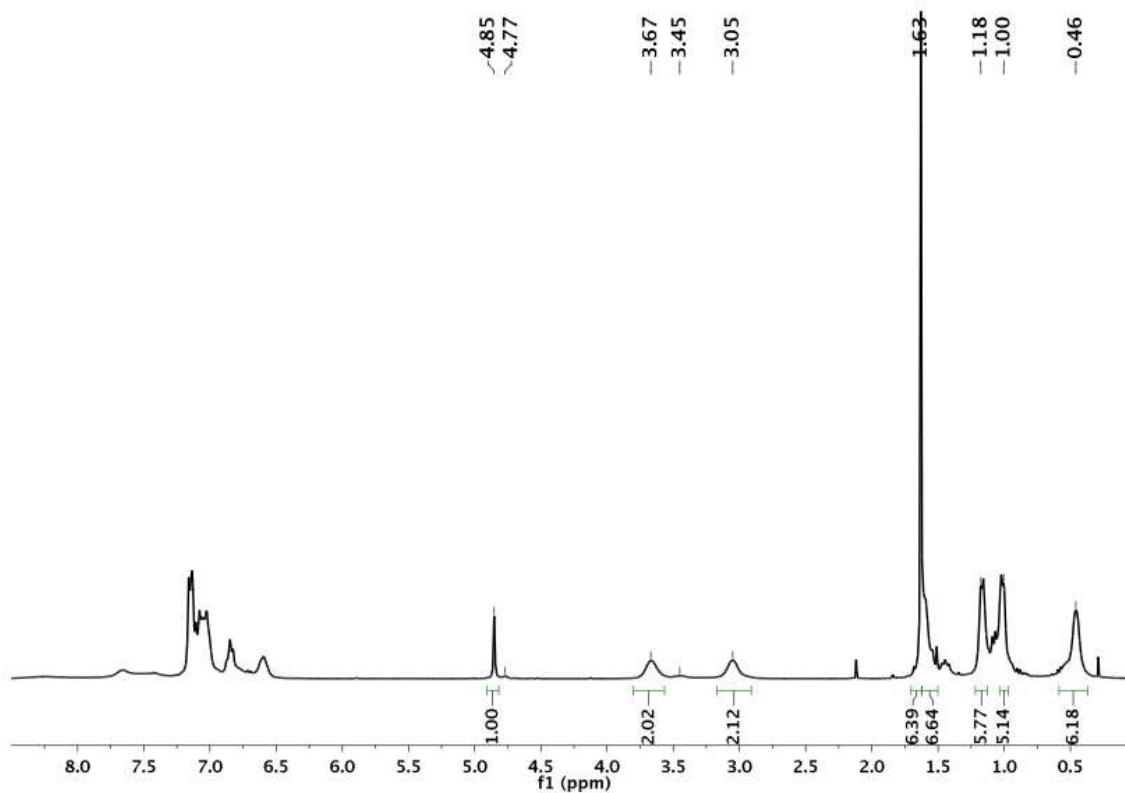

**Figure S12.**  $^1\text{H}$  NMR spectrum of the 1:1 reaction mixture of  $\text{Ph}_2\text{Te}_2$  and  $\text{LGa}\rightarrow\text{B}(\text{C}_6\text{F}_5)_3$  in  $\text{C}_6\text{D}_6$  after 10 days; after isolated the pale yellow crystals of **1**.

## Crystallographic data of 1-3

### Compound 1a

Table 1: Crystal structure data

| Identification code                               | cg_004m                                                                        |
|---------------------------------------------------|--------------------------------------------------------------------------------|
| Empirical formula                                 | C <sub>58</sub> H <sub>82</sub> Ga <sub>2</sub> N <sub>4</sub> Te <sub>2</sub> |
| Formula weight                                    | 1229.91                                                                        |
| Density (calculated)                              | 1.434 g · cm <sup>-3</sup>                                                     |
| <i>F</i> (000)                                    | 1248                                                                           |
| Temperature                                       | 130(1) K                                                                       |
| Crystal size                                      | 0.280 × 0.220 × 0.180 mm                                                       |
| Crystal colour                                    | colourless                                                                     |
| Crystal description                               | block                                                                          |
| Wavelength                                        | 0.71073 Å                                                                      |
| Crystal system                                    | monoclinic                                                                     |
| Space group                                       | <i>P</i> 2 <sub>1</sub> / <i>n</i>                                             |
| Unit cell dimensions                              |                                                                                |
| <i>a</i> [Å]                                      | 14.0688(10)                                                                    |
| <i>b</i> [Å]                                      | 13.8376(10)                                                                    |
| <i>c</i> [Å]                                      | 15.2807(11)                                                                    |
| $\alpha$ [°]                                      | 90                                                                             |
| $\beta$ [°]                                       | 106.759(2)                                                                     |
| $\gamma$ [°]                                      | 90                                                                             |
| Volume                                            | 2848.5(4) Å <sup>3</sup>                                                       |
| <i>Z</i>                                          | 2                                                                              |
| Cell measurement reflections used                 | 24228                                                                          |
| Cell measurement $\vartheta$ min/max              | 2.76°/32.50°                                                                   |
| Diffractometer control software                   | BRUKER D8 KAPPA APEX 2 Vers. 3.0-2009                                          |
| Diffractometer measurement device                 | Bruker D8 KAPPA series II with APEX II area detector system                    |
| Diffractometer measurement method                 | Data collection strategy APEX 2/COSMO                                          |
| $\vartheta$ range for data collection             | 2.110°- 32.618°                                                                |
| Completeness to $\vartheta = 25.242^\circ$        | 99.6%                                                                          |
| Completeness to $\vartheta_{\max} = 32.618^\circ$ | 98.6%                                                                          |
| Index ranges                                      | -20 ≤ <i>h</i> ≤ 21                                                            |
|                                                   | -20 ≤ <i>k</i> ≤ 20                                                            |
|                                                   | -21 ≤ <i>l</i> ≤ 22                                                            |
| Computing data reduction                          | BRUKER D8 KAPPA APEX 2 Vers. 3.0-2009                                          |
| Absorption coefficient                            | 1.988 mm <sup>-1</sup>                                                         |
| Absorption correction                             | Semi-empirical from equivalents                                                |
| Computation absorption correction                 | BRUKER AXS SMART APEX 2 Vers. 3.0-2009                                         |
| Max./min. Transmission                            | 0.75/0.50                                                                      |
| <i>R</i> <sub>merg</sub> before/after correction  | 0.0935 / 0.0492                                                                |
| Computing structure solution                      | BRUKER D8 KAPPA APEX 2 Vers. 3.0-2009                                          |
| Computing structure refinement                    | BRUKER AXS Inc. 2013 Vers. 2013/4                                              |
| Refinement method                                 | Full-matrix least-squares on <i>F</i> <sup>2</sup>                             |
| Reflections collected                             | 43835                                                                          |
| Independent reflections                           | 10256                                                                          |
| <i>R</i> <sub>int</sub>                           | 0.0375                                                                         |
| Reflections with <i>I</i> > 2σ( <i>I</i> )        | 8525                                                                           |
| Restraints                                        | 0                                                                              |
| Parameter                                         | 298                                                                            |
| Goof                                              | 1.081                                                                          |
| Weighting details                                 | $w = 1/[\sigma^2(F_{\text{obs}}^2) + (0.0679P)^2 + 6.9476P]$                   |



|                              |                                                       |
|------------------------------|-------------------------------------------------------|
|                              | where $P = (F_{\text{obs}}^2 + 2F_{\text{calc}}^2)/3$ |
| $R_1 [I > 2\sigma(I)]$       | 0.0440                                                |
| $wR_2 [I > 2\sigma(I)]$      | 0.1175                                                |
| $R_1$ [all data]             | 0.0573                                                |
| $wR_2$ [all data]            | 0.1300                                                |
| Absolute structure parameter |                                                       |
| Largest diff. peak and hole  | 3.763/-1.417                                          |

Table 2: Atomic coordinates ( $\times 10^4$ ) and equivalent isotropic displacement parameters ( $\text{\AA}^2 \times 10^3$ ) for cg\_004m.  $U_{\text{eq}}$  is defined as one third of the trace of the orthogonalized  $U_{ij}$  tensor.

|        | x       | y       | z       | $U_{\text{eq}}$ |
|--------|---------|---------|---------|-----------------|
| Te(1)  | 4218(1) | 6119(1) | 4406(1) | 17(1)           |
| Ga(1)  | 4427(1) | 4301(1) | 4104(1) | 13(1)           |
| N(1)   | 4755(2) | 4007(2) | 2955(2) | 18(1)           |
| N(2)   | 3181(2) | 3544(2) | 3781(2) | 16(1)           |
| C(1)   | 4050(2) | 3754(2) | 2195(2) | 21(1)           |
| C(2)   | 3074(2) | 3534(2) | 2174(2) | 23(1)           |
| H(2)   | 2610    | 3500    | 1584    | 27              |
| C(3)   | 2693(2) | 3357(2) | 2908(2) | 20(1)           |
| C(4)   | 4282(3) | 3644(3) | 1291(2) | 32(1)           |
| H(4A)  | 4014    | 4199    | 898     | 48              |
| H(4B)  | 3979    | 3048    | 990     | 48              |
| H(4C)  | 5003    | 3615    | 1400    | 48              |
| C(5)   | 1673(2) | 2904(3) | 2653(2) | 31(1)           |
| H(5A)  | 1564    | 2591    | 3191    | 47              |
| H(5B)  | 1623    | 2421    | 2172    | 47              |
| H(5C)  | 1170    | 3405    | 2429    | 47              |
| C(6)   | 5759(2) | 4087(2) | 2901(2) | 20(1)           |
| C(7)   | 6071(2) | 4923(3) | 2542(2) | 24(1)           |
| C(8)   | 7036(3) | 4933(3) | 2450(2) | 32(1)           |
| H(8)   | 7262    | 5490    | 2206    | 39              |
| C(9)   | 7662(3) | 4149(4) | 2705(3) | 36(1)           |
| H(9)   | 8307    | 4166    | 2626    | 44              |
| C(10)  | 7348(3) | 3338(3) | 3077(2) | 33(1)           |
| H(10)  | 7788    | 2807    | 3261    | 39              |
| C(11)  | 6398(2) | 3285(2) | 3189(2) | 25(1)           |
| C(12)  | 5424(3) | 5814(3) | 2250(2) | 28(1)           |
| H(12)  | 4765    | 5682    | 2351    | 34              |
| C(13)  | 5890(3) | 6683(3) | 2839(3) | 34(1)           |
| H(13A) | 5987    | 6530    | 3485    | 50              |
| H(13B) | 5448    | 7243    | 2668    | 50              |
| H(13C) | 6532    | 6833    | 2741    | 50              |
| C(14)  | 5250(4) | 6068(4) | 1234(3) | 43(1)           |
| H(14A) | 5891    | 6177    | 1116    | 65              |
| H(14B) | 4847    | 6656    | 1087    | 65              |
| H(14C) | 4903    | 5534    | 852     | 65              |
| C(15)  | 6063(3) | 2379(2) | 3573(2) | 28(1)           |
| H(15)  | 5531    | 2575    | 3852    | 34              |
| C(16)  | 6887(3) | 1899(3) | 4326(3) | 38(1)           |
| H(16A) | 7397    | 1647    | 4065    | 56              |
| H(16B) | 6607    | 1366    | 4596    | 56              |
| H(16C) | 7185    | 2375    | 4801    | 56              |
| C(17)  | 5603(3) | 1643(3) | 2817(3) | 43(1)           |

|        |         |         |         |       |
|--------|---------|---------|---------|-------|
| H(17A) | 6100    | 1448    | 2516    | 65    |
| H(17B) | 5035    | 1938    | 2367    | 65    |
| H(17C) | 5380    | 1074    | 3086    | 65    |
| C(18)  | 2740(2) | 3187(2) | 4467(2) | 19(1) |
| C(19)  | 3031(2) | 2268(2) | 4849(2) | 26(1) |
| C(20)  | 2555(3) | 1900(3) | 5465(3) | 34(1) |
| H(20)  | 2736    | 1279    | 5725    | 41    |
| C(21)  | 1834(3) | 2414(3) | 5703(3) | 37(1) |
| H(21)  | 1525    | 2150    | 6127    | 45    |
| C(22)  | 1555(3) | 3318(3) | 5325(2) | 32(1) |
| H(22)  | 1060    | 3672    | 5500    | 39    |
| C(23)  | 1991(2) | 3722(2) | 4689(2) | 22(1) |
| C(24)  | 1599(2) | 4676(2) | 4248(2) | 24(1) |
| H(24)  | 1962    | 4841    | 3793    | 29    |
| C(25)  | 480(3)  | 4617(3) | 3742(3) | 37(1) |
| H(25A) | 109     | 4501    | 4185    | 55    |
| H(25B) | 360     | 4086    | 3300    | 55    |
| H(25C) | 261     | 5226    | 3421    | 55    |
| C(26)  | 1773(3) | 5485(3) | 4955(3) | 38(1) |
| H(26A) | 1391    | 5353    | 5386    | 56    |
| H(26B) | 1559    | 6101    | 4646    | 56    |
| H(26C) | 2481    | 5518    | 5287    | 56    |
| C(27)  | 3810(3) | 1663(2) | 4583(3) | 33(1) |
| H(27A) | 4176    | 2097    | 4269    | 40    |
| C(28)  | 4562(4) | 1220(3) | 5406(4) | 46(1) |
| H(28A) | 4835    | 1725    | 5858    | 70    |
| H(28B) | 5100    | 922     | 5212    | 70    |
| H(28C) | 4236    | 727     | 5679    | 70    |
| C(29)  | 3303(5) | 871(4)  | 3904(4) | 60(2) |
| H(29A) | 2891    | 469     | 4177    | 90    |
| H(29B) | 3810    | 468     | 3758    | 90    |
| H(29C) | 2886    | 1170    | 3343    | 90    |

Table 3: Anisotropic displacement parameters ( $\text{\AA}^2 \times 10^3$ ) for cg\_004m. The anisotropic displacement factor exponent takes the form:  $-2\pi^2[h^2a^{*2}U_{11} + \dots + 2hka^*b^*U_{12}]$

|       | $U_{11}$ | $U_{22}$ | $U_{33}$ | $U_{23}$ | $U_{13}$ | $U_{12}$ |
|-------|----------|----------|----------|----------|----------|----------|
| Te(1) | 19(1)    | 13(1)    | 16(1)    | 0(1)     | 1(1)     | 2(1)     |
| Ga(1) | 12(1)    | 13(1)    | 13(1)    | -2(1)    | 3(1)     | 0(1)     |
| N(1)  | 13(1)    | 23(1)    | 17(1)    | -2(1)    | 3(1)     | 0(1)     |
| N(2)  | 15(1)    | 16(1)    | 16(1)    | -1(1)    | 4(1)     | 0(1)     |
| C(1)  | 18(1)    | 28(1)    | 14(1)    | -4(1)    | 2(1)     | 0(1)     |
| C(2)  | 17(1)    | 32(2)    | 17(1)    | -4(1)    | 2(1)     | -1(1)    |
| C(3)  | 16(1)    | 20(1)    | 21(1)    | -5(1)    | 3(1)     | -1(1)    |
| C(4)  | 25(2)    | 54(2)    | 18(1)    | -11(1)   | 7(1)     | -7(2)    |
| C(5)  | 21(1)    | 44(2)    | 26(2)    | -10(1)   | 4(1)     | -10(1)   |
| C(6)  | 16(1)    | 30(1)    | 17(1)    | -6(1)    | 6(1)     | 0(1)     |
| C(7)  | 16(1)    | 38(2)    | 18(1)    | -4(1)    | 7(1)     | -4(1)    |
| C(8)  | 21(2)    | 53(2)    | 26(2)    | -5(1)    | 11(1)    | -8(1)    |
| C(9)  | 17(1)    | 63(3)    | 32(2)    | -13(2)   | 12(1)    | -1(2)    |
| C(10) | 20(1)    | 49(2)    | 30(2)    | -13(2)   | 8(1)     | 8(1)     |
| C(11) | 20(1)    | 32(2)    | 22(1)    | -10(1)   | 4(1)     | 4(1)     |
| C(12) | 21(1)    | 36(2)    | 27(2)    | 4(1)     | 7(1)     | -4(1)    |
| C(13) | 31(2)    | 34(2)    | 40(2)    | 4(1)     | 16(2)    | -7(1)    |

|       |       |       |       |        |       |        |
|-------|-------|-------|-------|--------|-------|--------|
| C(14) | 40(2) | 57(3) | 28(2) | 13(2)  | 2(2)  | -5(2)  |
| C(15) | 24(2) | 27(1) | 33(2) | -8(1)  | 6(1)  | 7(1)   |
| C(16) | 38(2) | 36(2) | 36(2) | -3(2)  | 6(2)  | 15(2)  |
| C(17) | 45(2) | 32(2) | 44(2) | -15(2) | 0(2)  | 5(2)   |
| C(18) | 16(1) | 20(1) | 18(1) | 0(1)   | 3(1)  | -4(1)  |
| C(19) | 24(1) | 22(1) | 28(2) | 4(1)   | 2(1)  | -3(1)  |
| C(20) | 31(2) | 34(2) | 34(2) | 14(1)  | 2(1)  | -8(1)  |
| C(21) | 28(2) | 53(2) | 30(2) | 13(2)  | 7(1)  | -13(2) |
| C(22) | 22(2) | 51(2) | 25(2) | 4(1)   | 9(1)  | -5(1)  |
| C(23) | 15(1) | 29(1) | 20(1) | -1(1)  | 5(1)  | -3(1)  |
| C(24) | 18(1) | 28(1) | 27(1) | -3(1)  | 9(1)  | 2(1)   |
| C(25) | 24(2) | 44(2) | 39(2) | 1(2)   | 2(1)  | 9(2)   |
| C(26) | 31(2) | 40(2) | 48(2) | -16(2) | 22(2) | -4(2)  |
| C(27) | 36(2) | 20(1) | 40(2) | 3(1)   | 6(2)  | 2(1)   |
| C(28) | 42(2) | 21(2) | 64(3) | 2(2)   | -4(2) | 6(1)   |
| C(29) | 68(4) | 43(2) | 61(3) | -15(2) | 4(3)  | 14(2)  |

Table 4: Bond lengths [Å] for cg\_004m.

|               |           |             |          |
|---------------|-----------|-------------|----------|
| Te(1)-Ga(1)#1 | 2.5777(4) | C(9)-C(10)  | 1.387(6) |
| Te(1)-Ga(1)   | 2.5898(4) | C(10)-C(11) | 1.398(5) |
| Te(1)-Te(1)#1 | 3.9260(4) | C(11)-C(15) | 1.516(5) |
| Ga(1)-N(2)    | 1.979(2)  | C(12)-C(13) | 1.532(5) |
| Ga(1)-N(1)    | 1.982(2)  | C(12)-C(14) | 1.542(5) |
| Ga(1)-Te(1)#1 | 2.5777(4) | C(15)-C(16) | 1.530(5) |
| N(1)-C(1)     | 1.339(4)  | C(15)-C(17) | 1.537(5) |
| N(1)-C(6)     | 1.443(4)  | C(18)-C(23) | 1.407(4) |
| N(2)-C(3)     | 1.337(4)  | C(18)-C(19) | 1.409(4) |
| N(2)-C(18)    | 1.450(4)  | C(19)-C(20) | 1.400(5) |
| C(1)-C(2)     | 1.397(4)  | C(19)-C(27) | 1.525(5) |
| C(1)-C(4)     | 1.516(4)  | C(20)-C(21) | 1.371(6) |
| C(2)-C(3)     | 1.397(4)  | C(21)-C(22) | 1.387(6) |
| C(3)-C(5)     | 1.511(4)  | C(22)-C(23) | 1.407(5) |
| C(6)-C(7)     | 1.403(5)  | C(23)-C(24) | 1.513(5) |
| C(6)-C(11)    | 1.416(4)  | C(24)-C(26) | 1.525(5) |
| C(7)-C(8)     | 1.404(4)  | C(24)-C(25) | 1.543(5) |
| C(7)-C(12)    | 1.521(5)  | C(27)-C(28) | 1.520(6) |
| C(8)-C(9)     | 1.380(6)  | C(27)-C(29) | 1.536(6) |

#1 -x+1,-y+1,-z+1

Table 5: Bond angles [°] for cg\_004m.

|                       |            |                   |          |
|-----------------------|------------|-------------------|----------|
| Ga(1)#1-Te(1)-Ga(1)   | 81.117(11) | C(8)-C(9)-C(10)   | 120.0(3) |
| Ga(1)#1-Te(1)-Te(1)#1 | 40.673(7)  | C(9)-C(10)-C(11)  | 121.4(3) |
| Ga(1)-Te(1)-Te(1)#1   | 40.444(8)  | C(10)-C(11)-C(6)  | 117.7(3) |
| N(2)-Ga(1)-N(1)       | 94.92(10)  | C(10)-C(11)-C(15) | 120.4(3) |
| N(2)-Ga(1)-Te(1)#1    | 118.56(7)  | C(6)-C(11)-C(15)  | 121.9(3) |
| N(1)-Ga(1)-Te(1)#1    | 115.72(7)  | C(7)-C(12)-C(13)  | 110.2(3) |
| N(2)-Ga(1)-Te(1)      | 114.87(7)  | C(7)-C(12)-C(14)  | 112.9(3) |
| N(1)-Ga(1)-Te(1)      | 115.13(7)  | C(13)-C(12)-C(14) | 109.2(3) |
| Te(1)#1-Ga(1)-Te(1)   | 98.883(11) | C(11)-C(15)-C(16) | 113.4(3) |
| C(1)-N(1)-C(6)        | 117.5(2)   | C(11)-C(15)-C(17) | 111.5(3) |
| C(1)-N(1)-Ga(1)       | 121.3(2)   | C(16)-C(15)-C(17) | 109.9(3) |

|                  |            |                   |          |
|------------------|------------|-------------------|----------|
| C(6)-N(1)-Ga(1)  | 121.15(18) | C(23)-C(18)-C(19) | 121.5(3) |
| C(3)-N(2)-C(18)  | 116.8(2)   | C(23)-C(18)-N(2)  | 120.0(3) |
| C(3)-N(2)-Ga(1)  | 121.0(2)   | C(19)-C(18)-N(2)  | 118.3(3) |
| C(18)-N(2)-Ga(1) | 122.16(18) | C(20)-C(19)-C(18) | 118.0(3) |
| N(1)-C(1)-C(2)   | 123.6(3)   | C(20)-C(19)-C(27) | 120.0(3) |
| N(1)-C(1)-C(4)   | 121.1(3)   | C(18)-C(19)-C(27) | 122.0(3) |
| C(2)-C(1)-C(4)   | 115.2(3)   | C(21)-C(20)-C(19) | 121.6(3) |
| C(3)-C(2)-C(1)   | 128.4(3)   | C(20)-C(21)-C(22) | 120.0(3) |
| N(2)-C(3)-C(2)   | 124.1(3)   | C(21)-C(22)-C(23) | 121.2(4) |
| N(2)-C(3)-C(5)   | 120.9(3)   | C(22)-C(23)-C(18) | 117.7(3) |
| C(2)-C(3)-C(5)   | 114.9(3)   | C(22)-C(23)-C(24) | 118.6(3) |
| C(7)-C(6)-C(11)  | 121.7(3)   | C(18)-C(23)-C(24) | 123.7(3) |
| C(7)-C(6)-N(1)   | 120.5(3)   | C(23)-C(24)-C(26) | 111.2(3) |
| C(11)-C(6)-N(1)  | 117.7(3)   | C(23)-C(24)-C(25) | 111.4(3) |
| C(6)-C(7)-C(8)   | 117.9(3)   | C(26)-C(24)-C(25) | 109.0(3) |
| C(6)-C(7)-C(12)  | 123.7(3)   | C(28)-C(27)-C(19) | 112.5(4) |
| C(8)-C(7)-C(12)  | 118.5(3)   | C(28)-C(27)-C(29) | 110.4(3) |
| C(9)-C(8)-C(7)   | 121.3(4)   | C(19)-C(27)-C(29) | 110.1(4) |

#1 -x+1,-y+1,-z+1

*Compound 1b*

Table 1: Crystal structure data

| Identification code                                | cg_015m                                                                           |
|----------------------------------------------------|-----------------------------------------------------------------------------------|
| Empirical formula                                  | C <sub>61.50</sub> H <sub>86</sub> Ga <sub>2</sub> N <sub>4</sub> Te <sub>2</sub> |
| Formula weight                                     | 1275.98                                                                           |
| Density (calculated)                               | 1.336 g · cm <sup>-3</sup>                                                        |
| <i>F</i> (000)                                     | 2596                                                                              |
| Temperature                                        | 100(1) K                                                                          |
| Crystal size                                       | 0.220 × 0.180 × 0.130 mm                                                          |
| Crystal colour                                     | pale yellow                                                                       |
| Crystal description                                | block                                                                             |
| Wavelength                                         | 0.71073 Å                                                                         |
| Crystal system                                     | monoclinic                                                                        |
| Space group                                        | <i>C</i> 2/ <i>m</i>                                                              |
| Unit cell dimensions                               |                                                                                   |
| <i>a</i> [Å]                                       | 18.6322(4)                                                                        |
| <i>b</i> [Å]                                       | 20.9742(5)                                                                        |
| <i>c</i> [Å]                                       | 16.4363(4)                                                                        |
| $\alpha$ [°]                                       | 90                                                                                |
| $\beta$ [°]                                        | 98.9820(10)                                                                       |
| $\gamma$ [°]                                       | 90                                                                                |
| Volume                                             | 6344.5(3) Å <sup>3</sup>                                                          |
| <i>Z</i>                                           | 4                                                                                 |
| Cell measurement reflections used                  | 35084                                                                             |
| Cell measurement $\vartheta$ min/max               | 2.51°/32.14°                                                                      |
| Diffractometer control software                    | BRUKER D8 KAPPA APEX 2 Vers. 3.0-2009                                             |
| Diffractometer measurement device                  | Bruker D8 KAPPA series II with APEX II area detector system                       |
| Diffractometer measurement method                  | Data collection strategy APEX 2/COSMO                                             |
| $\vartheta$ range for data collection              | 1.819°- 32.155°                                                                   |
| Completeness to $\vartheta = 25.242^\circ$         | 99.7%                                                                             |
| Completeness to $\vartheta_{\max} = 32.155^\circ$  | 99.5%                                                                             |
| Index ranges                                       | -27 ≤ <i>h</i> ≤ 27                                                               |
|                                                    | -28 ≤ <i>k</i> ≤ 31                                                               |
|                                                    | -24 ≤ <i>l</i> ≤ 24                                                               |
| Computing data reduction                           | BRUKER D8 KAPPA APEX 2 Vers. 3.0-2009                                             |
| Absorption coefficient                             | 1.788 mm <sup>-1</sup>                                                            |
| Absorption correction                              | Semi-empirical from equivalents                                                   |
| Computation absorption correction                  | BRUKER AXS SMART APEX 2 Vers. 3.0-2009                                            |
| Max./min. Transmission                             | 0.75/0.68                                                                         |
| <i>R</i> <sub>merg</sub> before/after correction   | 0.0660 / 0.0423                                                                   |
| Computing structure solution                       | BRUKER D8 KAPPA APEX 2 Vers. 3.0-2009                                             |
| Computing structure refinement                     | BRUKER AXS Inc. 2013 Vers. 2013/4                                                 |
| Refinement method                                  | Full-matrix least-squares on <i>F</i> <sup>2</sup>                                |
| Reflections collected                              | 86728                                                                             |
| Independent reflections                            | 11354                                                                             |
| <i>R</i> <sub>int</sub>                            | 0.0319                                                                            |
| Reflections with <i>I</i> > 2σ( <i>I</i> )         | 9852                                                                              |
| Restraints                                         | 0                                                                                 |
| Parameter                                          | 342                                                                               |
| Goof                                               | 1.072                                                                             |
| Weighting details                                  | $w = 1/[\sigma^2(F_{\text{obs}}^2) + (0.0342P)^2 + 3.2989P]$                      |
|                                                    | where $P = (F_{\text{obs}}^2 + 2F_{\text{calc}}^2)/3$                             |
| <i>R</i> <sub>1</sub> [ <i>I</i> > 2σ( <i>I</i> )] | 0.0223                                                                            |

|                              |              |
|------------------------------|--------------|
| $wR_2 [I > 2\sigma(I)]$      | 0.0576       |
| $R_1$ [all data]             | 0.0293       |
| $wR_2$ [all data]            | 0.0606       |
| Absolute structure parameter |              |
| Largest diff. peak and hole  | 0.986/-0.453 |

Table 2: Atomic coordinates ( $\times 10^4$ ) and equivalent isotropic displacement parameters ( $\text{\AA}^2 \times 10^3$ ) for cg\_015m.  $U_{eq}$  is defined as one third of the trace of the orthogonalized  $U_{ij}$  tensor.

|        | <b>x</b> | <b>y</b> | <b>z</b> | <b><math>U_{eq}</math></b> |
|--------|----------|----------|----------|----------------------------|
| Te(1)  | -352(1)  | 5000     | 8795(1)  | 12(1)                      |
| Ga(1)  | 849(1)   | 5000     | 9818(1)  | 9(1)                       |
| N(1)   | 1550(1)  | 4298(1)  | 9719(1)  | 12(1)                      |
| C(1)   | 2262(1)  | 4398(1)  | 9940(1)  | 14(1)                      |
| C(2)   | 2573(1)  | 5000     | 10118(1) | 16(1)                      |
| H(2)   | 3059     | 5000     | 10399    | 19                         |
| C(3)   | 2796(1)  | 3851(1)  | 9980(1)  | 19(1)                      |
| H(3A)  | 2852     | 3655     | 10528    | 28                         |
| H(3B)  | 3267     | 4011     | 9876     | 28                         |
| H(3C)  | 2613     | 3532     | 9563     | 28                         |
| C(4)   | 1320(1)  | 3667(1)  | 9423(1)  | 13(1)                      |
| C(5)   | 1260(1)  | 3165(1)  | 9978(1)  | 14(1)                      |
| C(6)   | 1066(1)  | 2560(1)  | 9650(1)  | 18(1)                      |
| H(6)   | 1019     | 2216     | 10014    | 21                         |
| C(7)   | 946(1)   | 2451(1)  | 8808(1)  | 20(1)                      |
| H(7)   | 822      | 2036     | 8601     | 24                         |
| C(8)   | 1004(1)  | 2950(1)  | 8272(1)  | 21(1)                      |
| H(8)   | 914      | 2873     | 7695     | 25                         |
| C(9)   | 1189(1)  | 3563(1)  | 8564(1)  | 18(1)                      |
| C(10)  | 1413(1)  | 3237(1)  | 10910(1) | 14(1)                      |
| H(10)  | 1611     | 3674     | 11044    | 17                         |
| C(11)  | 1975(1)  | 2745(1)  | 11306(1) | 18(1)                      |
| H(11A) | 1771     | 2315     | 11223    | 28                         |
| H(11B) | 2098     | 2832     | 11897    | 28                         |
| H(11C) | 2415     | 2776     | 11049    | 28                         |
| C(12)  | 713(1)   | 3157(1)  | 11279(1) | 19(1)                      |
| H(12A) | 342      | 3451     | 11006    | 29                         |
| H(12B) | 810      | 3252     | 11870    | 29                         |
| H(12C) | 538      | 2718     | 11197    | 29                         |
| C(13)  | 1291(1)  | 4085(1)  | 7958(1)  | 33(1)                      |
| H(13)  | 1263     | 4503     | 8245     | 40                         |
| C(14)  | 2043(1)  | 4036(1)  | 7706(1)  | 51(1)                      |
| H(14A) | 2415     | 4086     | 8193     | 76                         |
| H(14B) | 2100     | 4371     | 7306     | 76                         |
| H(14C) | 2097     | 3617     | 7456     | 76                         |
| C(15)  | 696(1)   | 4083(1)  | 7197(1)  | 45(1)                      |
| H(15A) | 721      | 3685     | 6892     | 68                         |
| H(15B) | 769      | 4445     | 6842     | 68                         |
| H(15C) | 218      | 4119     | 7372     | 68                         |
| Te(2)  | 5143(1)  | 5000     | 6226(1)  | 12(1)                      |
| Ga(2)  | 5886(1)  | 5000     | 5030(1)  | 10(1)                      |
| N(2)   | 6609(1)  | 5693(1)  | 5020(1)  | 12(1)                      |
| C(21)  | 7224(1)  | 5598(1)  | 4714(1)  | 14(1)                      |
| C(22)  | 7471(1)  | 5000     | 4500(1)  | 16(1)                      |

|        |         |         |         |       |
|--------|---------|---------|---------|-------|
| H(22)  | 7848    | 5000    | 4173    | 19    |
| C(23)  | 7719(1) | 6154(1) | 4607(1) | 22(1) |
| H(23A) | 7502    | 6412    | 4136    | 33    |
| H(23B) | 8193    | 5993    | 4511    | 33    |
| H(23C) | 7784    | 6416    | 5107    | 33    |
| C(24)  | 6494(1) | 6325(1) | 5327(1) | 13(1) |
| C(25)  | 6219(1) | 6817(1) | 4783(1) | 16(1) |
| C(26)  | 6164(1) | 7428(1) | 5112(1) | 20(1) |
| H(26)  | 5977    | 7767    | 4757    | 23    |
| C(27)  | 6377(1) | 7550(1) | 5940(1) | 21(1) |
| H(27)  | 6344    | 7970    | 6147    | 25    |
| C(28)  | 6641(1) | 7058(1) | 6471(1) | 19(1) |
| H(28)  | 6782    | 7145    | 7041    | 22    |
| C(29)  | 6701(1) | 6439(1) | 6178(1) | 15(1) |
| C(30)  | 5989(1) | 6721(1) | 3861(1) | 18(1) |
| H(30)  | 6096    | 6271    | 3721    | 21    |
| C(31)  | 5172(1) | 6840(1) | 3622(1) | 24(1) |
| H(31A) | 4904    | 6562    | 3948    | 36    |
| H(31B) | 5026    | 6748    | 3035    | 36    |
| H(31C) | 5064    | 7287    | 3729    | 36    |
| C(32)  | 6397(1) | 7171(1) | 3350(1) | 29(1) |
| H(32A) | 6230    | 7610    | 3405    | 44    |
| H(32B) | 6300    | 7044    | 2769    | 44    |
| H(32C) | 6920    | 7146    | 3549    | 44    |
| C(33)  | 7017(1) | 5918(1) | 6769(1) | 21(1) |
| H(33)  | 6850    | 5501    | 6511    | 25    |
| C(34)  | 6746(1) | 5953(1) | 7601(1) | 27(1) |
| H(34A) | 6919    | 6348    | 7883    | 41    |
| H(34B) | 6933    | 5587    | 7940    | 41    |
| H(34C) | 6214    | 5945    | 7513    | 41    |
| C(35)  | 7850(1) | 5924(1) | 6885(1) | 31(1) |
| H(35A) | 8029    | 6344    | 7083    | 47    |
| H(35B) | 8012    | 5832    | 6358    | 47    |
| H(35C) | 8042    | 5598    | 7289    | 47    |
| C(41)  | 0       | 3977(2) | 5000    | 56(1) |
| H(41)  | 0       | 3521    | 5000    | 67    |
| C(42)  | 433(2)  | 4305(2) | 4543(3) | 38(1) |
| H(42)  | 732     | 4074    | 4223    | 45    |
| C(43)  | 430(2)  | 5000    | 4550(2) | 47(1) |
| H(43)  | 727     | 5234    | 4237    | 57    |
| C(44)  | 0       | 5311(3) | 5000    | 47(2) |
| C(41A) | 0       | 6045    | 5000    | 48    |
| H(41B) | -331    | 6198    | 5348    | 72    |
| H(41C) | 480     | 6198    | 5203    | 72    |
| H(41D) | -149    | 6198    | 4449    | 72    |

Table 3: Anisotropic displacement parameters ( $\text{\AA}^2 \times 10^3$ ) for cg\_015m. The anisotropic displacement factor exponent takes the form:  $-2\pi^2[h^2a^{*2}U_{11} + \dots + 2hka^*b^*U_{12}]$

|       | $U_{11}$ | $U_{22}$ | $U_{33}$ | $U_{23}$ | $U_{13}$ | $U_{12}$ |
|-------|----------|----------|----------|----------|----------|----------|
| Te(1) | 10(1)    | 16(1)    | 9(1)     | 0        | 0(1)     | 0        |
| Ga(1) | 9(1)     | 10(1)    | 9(1)     | 0        | 1(1)     | 0        |
| N(1)  | 11(1)    | 12(1)    | 11(1)    | -1(1)    | 1(1)     | 0(1)     |
| C(1)  | 13(1)    | 15(1)    | 14(1)    | 1(1)     | 2(1)     | 3(1)     |

|        |       |       |       |       |        |        |
|--------|-------|-------|-------|-------|--------|--------|
| C(2)   | 10(1) | 17(1) | 19(1) | 0     | 0(1)   | 0      |
| C(3)   | 13(1) | 18(1) | 26(1) | 1(1)  | 2(1)   | 5(1)   |
| C(4)   | 12(1) | 12(1) | 14(1) | -2(1) | 1(1)   | 2(1)   |
| C(5)   | 10(1) | 13(1) | 16(1) | -2(1) | 0(1)   | 1(1)   |
| C(6)   | 15(1) | 13(1) | 23(1) | -2(1) | 1(1)   | -1(1)  |
| C(7)   | 16(1) | 17(1) | 26(1) | -9(1) | -1(1)  | 1(1)   |
| C(8)   | 21(1) | 22(1) | 17(1) | -8(1) | -2(1)  | 4(1)   |
| C(9)   | 20(1) | 18(1) | 14(1) | -3(1) | 0(1)   | 5(1)   |
| C(10)  | 13(1) | 13(1) | 15(1) | 0(1)  | 0(1)   | -1(1)  |
| C(11)  | 16(1) | 18(1) | 20(1) | 2(1)  | -2(1)  | 2(1)   |
| C(12)  | 16(1) | 19(1) | 23(1) | 2(1)  | 5(1)   | 1(1)   |
| C(13)  | 68(1) | 21(1) | 12(1) | -2(1) | 5(1)   | 5(1)   |
| C(14)  | 62(2) | 69(2) | 22(1) | 8(1)  | 5(1)   | -33(1) |
| C(15)  | 75(2) | 44(1) | 15(1) | 0(1)  | 2(1)   | 33(1)  |
| Te(2)  | 10(1) | 17(1) | 9(1)  | 0     | 1(1)   | 0      |
| Ga(2)  | 9(1)  | 10(1) | 10(1) | 0     | 1(1)   | 0      |
| N(2)   | 12(1) | 12(1) | 13(1) | 0(1)  | 2(1)   | -1(1)  |
| C(21)  | 12(1) | 16(1) | 14(1) | 2(1)  | 2(1)   | -2(1)  |
| C(22)  | 14(1) | 18(1) | 16(1) | 0     | 6(1)   | 0      |
| C(23)  | 17(1) | 19(1) | 31(1) | 3(1)  | 9(1)   | -4(1)  |
| C(24)  | 11(1) | 11(1) | 17(1) | 0(1)  | 3(1)   | -1(1)  |
| C(25)  | 14(1) | 14(1) | 19(1) | 4(1)  | 5(1)   | -1(1)  |
| C(26)  | 20(1) | 13(1) | 27(1) | 3(1)  | 7(1)   | 1(1)   |
| C(27)  | 21(1) | 13(1) | 31(1) | -3(1) | 8(1)   | -2(1)  |
| C(28)  | 18(1) | 17(1) | 22(1) | -5(1) | 3(1)   | -4(1)  |
| C(29)  | 14(1) | 13(1) | 17(1) | -1(1) | 1(1)   | -3(1)  |
| C(30)  | 17(1) | 19(1) | 18(1) | 6(1)  | 4(1)   | 1(1)   |
| C(31)  | 17(1) | 26(1) | 27(1) | 7(1)  | 0(1)   | 2(1)   |
| C(32)  | 26(1) | 36(1) | 26(1) | 14(1) | 8(1)   | -3(1)  |
| C(33)  | 28(1) | 15(1) | 16(1) | -1(1) | -5(1)  | -1(1)  |
| C(34)  | 38(1) | 25(1) | 18(1) | 0(1)  | -2(1)  | -8(1)  |
| C(35)  | 29(1) | 36(1) | 26(1) | -3(1) | -5(1)  | 11(1)  |
| C(41)  | 54(2) | 35(2) | 65(2) | 0     | -32(2) | 0      |
| C(42)  | 22(2) | 46(2) | 42(2) | -2(2) | -7(1)  | 3(2)   |
| C(43)  | 36(2) | 54(2) | 43(2) | 0     | -20(1) | 0      |
| C(44)  | 51(4) | 34(3) | 44(3) | 0     | -34(3) | 0      |
| C(41A) | 48    | 48    | 48    | 0     | 8      | 0      |

Table 4: Bond lengths [Å] for cg\_015m.

|               |            |               |            |
|---------------|------------|---------------|------------|
| Te(1)-Ga(1)   | 2.5809(2)  | Ga(2)-N(2)    | 1.9836(11) |
| Ga(1)-N(1)    | 1.9922(11) | N(2)-C(21)    | 1.3369(16) |
| Ga(1)-Te(1)#1 | 2.5909(2)  | N(2)-C(24)    | 1.4459(16) |
| N(1)-C(1)     | 1.3365(17) | C(21)-C(22)   | 1.3980(15) |
| N(1)-C(4)     | 1.4509(16) | C(21)-C(23)   | 1.5141(18) |
| C(1)-C(2)     | 1.4008(15) | C(22)-C(21)#2 | 1.3980(15) |
| C(1)-C(3)     | 1.5126(18) | C(24)-C(25)   | 1.4091(18) |
| C(2)-C(1)#2   | 1.4007(15) | C(24)-C(29)   | 1.4123(17) |
| C(4)-C(5)     | 1.4096(18) | C(25)-C(26)   | 1.4004(19) |
| C(4)-C(9)     | 1.4117(17) | C(25)-C(30)   | 1.5226(19) |
| C(5)-C(6)     | 1.4024(18) | C(26)-C(27)   | 1.382(2)   |
| C(5)-C(10)    | 1.5208(17) | C(27)-C(28)   | 1.390(2)   |
| C(6)-C(7)     | 1.3856(19) | C(28)-C(29)   | 1.3961(18) |
| C(7)-C(8)     | 1.382(2)   | C(29)-C(33)   | 1.5179(19) |



|               |            |             |            |
|---------------|------------|-------------|------------|
| C(8)-C(9)     | 1.398(2)   | C(30)-C(31) | 1.532(2)   |
| C(9)-C(13)    | 1.512(2)   | C(30)-C(32) | 1.5405(19) |
| C(10)-C(12)   | 1.5308(18) | C(33)-C(34) | 1.532(2)   |
| C(10)-C(11)   | 1.5410(19) | C(33)-C(35) | 1.535(2)   |
| C(13)-C(14)   | 1.525(3)   | C(41)-C(42) | 1.371(4)   |
| C(13)-C(15)   | 1.537(3)   | C(42)-C(43) | 1.459(4)   |
| Te(2)-Ga(2)   | 2.5755(2)  | C(43)-C(44) | 1.341(4)   |
| Te(2)-Ga(2)#3 | 2.5887(2)  |             |            |

#1 -x,-y+1,-z+2 #2 x,-y+1,z #3 -x+1,-y+1,-z+1

Table 5: Bond angles [°] for cg\_015m.

|                     |            |                     |            |
|---------------------|------------|---------------------|------------|
| Ga(1)-Te(1)-Ga(1)#1 | 79.609(7)  | N(2)-Ga(2)-Te(2)    | 116.92(3)  |
| N(1)-Ga(1)-N(1)#2   | 95.38(6)   | N(2)-Ga(2)-Te(2)#3  | 114.41(3)  |
| N(1)-Ga(1)-Te(1)    | 117.34(3)  | Te(2)-Ga(2)-Te(2)#3 | 100.944(7) |
| N(1)-Ga(1)-Te(1)#1  | 113.66(3)  | C(21)-N(2)-C(24)    | 116.77(11) |
| Te(1)-Ga(1)-Te(1)#1 | 100.393(7) | C(21)-N(2)-Ga(2)    | 121.15(9)  |
| C(1)-N(1)-C(4)      | 117.62(11) | C(24)-N(2)-Ga(2)    | 122.08(8)  |
| C(1)-N(1)-Ga(1)     | 119.81(9)  | N(2)-C(21)-C(22)    | 124.25(13) |
| C(4)-N(1)-Ga(1)     | 122.57(8)  | N(2)-C(21)-C(23)    | 120.12(12) |
| N(1)-C(1)-C(2)      | 123.95(13) | C(22)-C(21)-C(23)   | 115.60(12) |
| N(1)-C(1)-C(3)      | 120.69(12) | C(21)#2-C(22)-C(21) | 127.36(16) |
| C(2)-C(1)-C(3)      | 115.32(12) | C(25)-C(24)-C(29)   | 121.33(12) |
| C(1)#2-C(2)-C(1)    | 128.75(17) | C(25)-C(24)-N(2)    | 120.68(11) |
| C(5)-C(4)-C(9)      | 120.87(12) | C(29)-C(24)-N(2)    | 117.91(11) |
| C(5)-C(4)-N(1)      | 120.88(11) | C(26)-C(25)-C(24)   | 117.89(12) |
| C(9)-C(4)-N(1)      | 118.18(11) | C(26)-C(25)-C(30)   | 118.61(12) |
| C(6)-C(5)-C(4)      | 117.93(11) | C(24)-C(25)-C(30)   | 123.50(12) |
| C(6)-C(5)-C(10)     | 118.31(11) | C(27)-C(26)-C(25)   | 121.45(13) |
| C(4)-C(5)-C(10)     | 123.74(11) | C(26)-C(27)-C(28)   | 120.05(13) |
| C(7)-C(6)-C(5)      | 121.70(13) | C(27)-C(28)-C(29)   | 120.90(13) |
| C(8)-C(7)-C(6)      | 119.64(13) | C(28)-C(29)-C(24)   | 118.36(12) |
| C(7)-C(8)-C(9)      | 121.17(12) | C(28)-C(29)-C(33)   | 119.54(12) |
| C(8)-C(9)-C(4)      | 118.68(13) | C(24)-C(29)-C(33)   | 122.04(12) |
| C(8)-C(9)-C(13)     | 119.39(12) | C(25)-C(30)-C(31)   | 110.34(11) |
| C(4)-C(9)-C(13)     | 121.81(13) | C(25)-C(30)-C(32)   | 112.10(12) |
| C(5)-C(10)-C(12)    | 110.57(11) | C(31)-C(30)-C(32)   | 108.36(12) |
| C(5)-C(10)-C(11)    | 111.50(11) | C(29)-C(33)-C(34)   | 112.84(13) |
| C(12)-C(10)-C(11)   | 108.92(11) | C(29)-C(33)-C(35)   | 110.96(13) |
| C(9)-C(13)-C(14)    | 110.14(15) | C(34)-C(33)-C(35)   | 110.83(13) |
| C(9)-C(13)-C(15)    | 112.68(17) | C(42)-C(41)-C(42)#4 | 119.8(4)   |
| C(14)-C(13)-C(15)   | 110.81(14) | C(41)-C(42)-C(43)   | 119.5(4)   |
| Ga(2)-Te(2)-Ga(2)#3 | 79.056(7)  | C(44)-C(43)-C(42)   | 119.6(4)   |
| N(2)#2-Ga(2)-N(2)   | 94.20(6)   |                     |            |

#1 -x,-y+1,-z+2 #2 x,-y+1,z #3 -x+1,-y+1,-z+1 #4 -x,y,-z+1

## Compound 2

Table 1: Crystal structure data

| Identification code                                | cg_005m                                                           |
|----------------------------------------------------|-------------------------------------------------------------------|
| Empirical formula                                  | C <sub>41</sub> H <sub>51</sub> Ga N <sub>2</sub> Te <sub>2</sub> |
| Formula weight                                     | 896.75                                                            |
| Density (calculated)                               | 1.552 g · cm <sup>-3</sup>                                        |
| <i>F</i> (000)                                     | 3568                                                              |
| Temperature                                        | 100(1) K                                                          |
| Crystal size                                       | 0.415 × 0.326 × 0.198 mm                                          |
| Crystal colour                                     | yellow                                                            |
| Crystal description                                | plate                                                             |
| Wavelength                                         | 0.71073 Å                                                         |
| Crystal system                                     | orthorhombic                                                      |
| Space group                                        | <i>P b c a</i>                                                    |
| Unit cell dimensions                               |                                                                   |
| <i>a</i> [Å]                                       | 19.1512(8)                                                        |
| <i>b</i> [Å]                                       | 19.7070(8)                                                        |
| <i>c</i> [Å]                                       | 20.3343(8)                                                        |
| $\alpha$ [°]                                       | 90                                                                |
| $\beta$ [°]                                        | 90                                                                |
| $\gamma$ [°]                                       | 90                                                                |
| Volume                                             | 7674.4(5) Å <sup>3</sup>                                          |
| <i>Z</i>                                           | 8                                                                 |
| Cell measurement reflections used                  | 46638                                                             |
| Cell measurement $\vartheta$ min/max               | 2.27°/30.20°                                                      |
| Diffractometer control software                    | BRUKER D8 KAPPA APEX 2 Vers. 3.0-2009                             |
| Diffractometer measurement device                  | Bruker D8 KAPPA series II with APEX II area detector system       |
| Diffractometer measurement method                  | Data collection strategy APEX 2/COSMO                             |
| $\vartheta$ range for data collection              | 2.003°- 30.255°                                                   |
| Completeness to $\vartheta = 25.242^\circ$         | 99.3%                                                             |
| Completeness to $\vartheta_{\max} = 30.255^\circ$  | 98.4%                                                             |
| Index ranges                                       | -27 ≤ <i>h</i> ≤ 27                                               |
|                                                    | -27 ≤ <i>k</i> ≤ 26                                               |
|                                                    | -26 ≤ <i>l</i> ≤ 28                                               |
| Computing data reduction                           | BRUKER D8 KAPPA APEX 2 Vers. 3.0-2009                             |
| Absorption coefficient                             | 2.237 mm <sup>-1</sup>                                            |
| Absorption correction                              | Semi-empirical from equivalents                                   |
| Computation absorption correction                  | BRUKER AXS SMART APEX 2 Vers. 3.0-2009                            |
| Max./min. Transmission                             | 0.75/0.52                                                         |
| <i>R</i> <sub>merg</sub> before/after correction   | 0.0902 / 0.0554                                                   |
| Computing structure solution                       | BRUKER D8 KAPPA APEX 2 Vers. 3.0-2009                             |
| Computing structure refinement                     | BRUKER AXS Inc. 2013 Vers. 2013/4                                 |
| Refinement method                                  | Full-matrix least-squares on <i>F</i> <sup>2</sup>                |
| Reflections collected                              | 131905                                                            |
| Independent reflections                            | 11268                                                             |
| <i>R</i> <sub>int</sub>                            | 0.0446                                                            |
| Reflections with <i>I</i> > 2σ( <i>I</i> )         | 7726                                                              |
| Restraints                                         | 0                                                                 |
| Parameter                                          | 415                                                               |
| Goof                                               | 1.127                                                             |
| Weighting details                                  | $w = 1/[\sigma^2(F_{\text{obs}}^2) + (0.0247P)^2 + 63.1295P]$     |
|                                                    | where $P = (F_{\text{obs}}^2 + 2F_{\text{calc}}^2)/3$             |
| <i>R</i> <sub>1</sub> [ <i>I</i> > 2σ( <i>I</i> )] | 0.0469                                                            |

|                              |              |
|------------------------------|--------------|
| $wR_2 [I > 2\sigma(I)]$      | 0.0941       |
| $R_1$ [all data]             | 0.0870       |
| $wR_2$ [all data]            | 0.1249       |
| Absolute structure parameter |              |
| Largest diff. peak and hole  | 2.287/-1.586 |

Table 2: Atomic coordinates ( $\times 10^4$ ) and equivalent isotropic displacement parameters ( $\text{\AA}^2 \times 10^3$ ) for cg\_005m.  $U_{eq}$  is defined as one third of the trace of the orthogonalized  $U_{ij}$  tensor.

|        | <b>x</b> | <b>y</b> | <b>z</b> | <b><math>U_{eq}</math></b> |
|--------|----------|----------|----------|----------------------------|
| Ga(1)  | 3542(1)  | 6301(1)  | 2973(1)  | 16(1)                      |
| Te(1)  | 2286(1)  | 6266(1)  | 2546(1)  | 27(1)                      |
| Te(2)  | 3630(1)  | 6295(1)  | 4253(1)  | 21(1)                      |
| N(1)   | 4091(2)  | 5566(2)  | 2593(2)  | 20(1)                      |
| N(2)   | 4099(2)  | 7061(2)  | 2626(2)  | 17(1)                      |
| C(1)   | 4783(2)  | 5673(2)  | 2561(2)  | 22(1)                      |
| C(2)   | 5084(2)  | 6305(2)  | 2603(2)  | 14(1)                      |
| H(2)   | 5575     | 6302     | 2670     | 17                         |
| C(3)   | 4785(2)  | 6955(2)  | 2567(2)  | 18(1)                      |
| C(4)   | 5267(2)  | 5074(3)  | 2482(3)  | 30(1)                      |
| H(4A)  | 5231     | 4779     | 2868     | 44                         |
| H(4B)  | 5748     | 5238     | 2440     | 44                         |
| H(4C)  | 5139     | 4818     | 2087     | 44                         |
| C(5)   | 5274(2)  | 7533(2)  | 2452(3)  | 25(1)                      |
| H(5A)  | 5010     | 7934     | 2313     | 37                         |
| H(5B)  | 5608     | 7408     | 2107     | 37                         |
| H(5C)  | 5527     | 7635     | 2859     | 37                         |
| C(6)   | 3818(2)  | 4909(2)  | 2383(3)  | 28(1)                      |
| C(7)   | 3732(2)  | 4382(2)  | 2834(3)  | 31(1)                      |
| C(8)   | 3507(2)  | 3755(3)  | 2585(3)  | 36(1)                      |
| H(8)   | 3440     | 3389     | 2883     | 43                         |
| C(9)   | 3382(3)  | 3651(3)  | 1937(4)  | 46(2)                      |
| H(9)   | 3243     | 3215     | 1787     | 55                         |
| C(10)  | 3453(3)  | 4176(3)  | 1501(4)  | 44(2)                      |
| H(10)  | 3361     | 4103     | 1047     | 53                         |
| C(11)  | 3661(3)  | 4822(3)  | 1715(3)  | 35(1)                      |
| C(12)  | 3861(3)  | 4459(2)  | 3561(3)  | 32(1)                      |
| H(12)  | 4053     | 4923     | 3641     | 39                         |
| C(13)  | 3174(3)  | 4393(3)  | 3939(4)  | 48(2)                      |
| H(13A) | 2826     | 4696     | 3742     | 72                         |
| H(13B) | 3247     | 4519     | 4400     | 72                         |
| H(13C) | 3009     | 3924     | 3914     | 72                         |
| C(14)  | 4393(3)  | 3936(3)  | 3821(3)  | 37(1)                      |
| H(14A) | 4195     | 3479     | 3787     | 56                         |
| H(14B) | 4502     | 4035     | 4282     | 56                         |
| H(14C) | 4822     | 3961     | 3559     | 56                         |
| C(15)  | 3708(4)  | 5386(3)  | 1217(3)  | 51(2)                      |
| H(15)  | 3684     | 5825     | 1461     | 61                         |
| C(16)  | 4403(4)  | 5375(5)  | 840(4)   | 67(2)                      |
| H(16A) | 4790     | 5425     | 1151     | 101                        |
| H(16B) | 4413     | 5750     | 523      | 101                        |
| H(16C) | 4449     | 4943     | 605      | 101                        |
| C(17)  | 3101(4)  | 5378(4)  | 727(4)   | 66(2)                      |
| H(17A) | 3142     | 4979     | 442      | 99                         |

|        |         |         |         |       |
|--------|---------|---------|---------|-------|
| H(17B) | 3114    | 5790    | 458     | 99    |
| H(17C) | 2658    | 5358    | 968     | 99    |
| C(18)  | 3819(2) | 7726(2) | 2466(2) | 20(1) |
| C(19)  | 3603(3) | 7855(2) | 1819(3) | 26(1) |
| C(20)  | 3369(3) | 8501(3) | 1656(3) | 31(1) |
| H(20)  | 3245    | 8596    | 1213    | 38    |
| C(21)  | 3317(3) | 9007(2) | 2121(3) | 31(1) |
| H(21)  | 3145    | 9441    | 2001    | 37    |
| C(22)  | 3510(2) | 8878(2) | 2761(3) | 27(1) |
| H(22)  | 3468    | 9226    | 3082    | 32    |
| C(23)  | 3769(2) | 8242(2) | 2944(2) | 20(1) |
| C(24)  | 3625(3) | 7311(3) | 1296(3) | 36(1) |
| H(24)  | 3663    | 6862    | 1522    | 44    |
| C(25)  | 4271(3) | 7395(4) | 854(3)  | 53(2) |
| H(25A) | 4219    | 7805    | 586     | 80    |
| H(25B) | 4315    | 6999    | 566     | 80    |
| H(25C) | 4690    | 7435    | 1128    | 80    |
| C(26)  | 2962(3) | 7304(3) | 876(3)  | 41(1) |
| H(26A) | 2551    | 7290    | 1163    | 61    |
| H(26B) | 2965    | 6903    | 592     | 61    |
| H(26C) | 2946    | 7714    | 604     | 61    |
| C(27)  | 4002(2) | 8143(2) | 3647(3) | 25(1) |
| H(27)  | 4164    | 7664    | 3696    | 30    |
| C(28)  | 4614(3) | 8612(3) | 3827(3) | 32(1) |
| H(28A) | 4981    | 8571    | 3493    | 48    |
| H(28B) | 4802    | 8480    | 4256    | 48    |
| H(28C) | 4450    | 9082    | 3845    | 48    |
| C(29)  | 3414(3) | 8261(3) | 4142(3) | 37(1) |
| H(29A) | 3286    | 8742    | 4143    | 56    |
| H(29B) | 3571    | 8128    | 4582    | 56    |
| H(29C) | 3007    | 7988    | 4017    | 56    |
| C(31)  | 4747(2) | 6229(2) | 4285(2) | 22(1) |
| C(32)  | 5081(3) | 5603(3) | 4316(4) | 42(2) |
| C(33)  | 5806(3) | 5554(3) | 4294(4) | 52(2) |
| C(34)  | 6191(3) | 6125(4) | 4246(4) | 58(2) |
| C(35)  | 5884(3) | 6760(3) | 4241(3) | 37(1) |
| C(36)  | 5162(2) | 6807(3) | 4268(3) | 28(1) |
| H(32)  | 4812    | 5200    | 4355    | 34    |
| H(33)  | 6029    | 5123    | 4309    | 34    |
| H(34)  | 6682    | 6091    | 4209    | 34    |
| H(35)  | 6163    | 7156    | 4221    | 34    |
| H(36)  | 4949    | 7242    | 4276    | 34    |
| C(41)  | 1832(2) | 6414(3) | 3483(2) | 25(1) |
| C(42)  | 1524(3) | 5894(4) | 3820(3) | 46(2) |
| H(42)  | 1522    | 5446    | 3648    | 56    |
| C(43)  | 1238(4) | 6027(4) | 4382(4) | 54(2) |
| H(43)  | 1025    | 5659    | 4607    | 65    |
| C(44)  | 1202(3) | 6644(5) | 4685(4) | 66(3) |
| H(44)  | 976     | 6704    | 5097    | 79    |
| C(45)  | 1516(4) | 7183(4) | 4363(4) | 57(2) |
| H(45)  | 1522    | 7624    | 4551    | 68    |
| C(46)  | 1822(3) | 7065(3) | 3759(3) | 39(1) |
| H(46)  | 2031    | 7431    | 3527    | 47    |

Table 3: Anisotropic displacement parameters ( $\text{\AA}^2 \times 10^3$ ) for cg\_005m. The anisotropic displacement factor exponent takes the form:  $-2\pi^2[h^2a^{*2}U_{11} + \dots + 2hka^*b^*U_{12}]$

|       | $U_{11}$ | $U_{22}$ | $U_{33}$ | $U_{23}$ | $U_{13}$ | $U_{12}$ |
|-------|----------|----------|----------|----------|----------|----------|
| Ga(1) | 10(1)    | 16(1)    | 22(1)    | -2(1)    | 1(1)     | 0(1)     |
| Te(1) | 11(1)    | 44(1)    | 27(1)    | -5(1)    | -2(1)    | -1(1)    |
| Te(2) | 16(1)    | 24(1)    | 24(1)    | 1(1)     | 1(1)     | -1(1)    |
| N(1)  | 13(2)    | 16(2)    | 31(2)    | -5(1)    | 1(2)     | 2(1)     |
| N(2)  | 11(2)    | 18(2)    | 23(2)    | -2(1)    | 0(1)     | -1(1)    |
| C(1)  | 14(2)    | 24(2)    | 28(3)    | -4(2)    | -2(2)    | 4(2)     |
| C(2)  | 14(2)    | 21(2)    | 8(2)     | -9(2)    | -1(1)    | 2(1)     |
| C(3)  | 13(2)    | 25(2)    | 17(2)    | -1(2)    | 0(2)     | -3(2)    |
| C(4)  | 17(2)    | 29(2)    | 43(3)    | -6(2)    | 3(2)     | 7(2)     |
| C(5)  | 14(2)    | 29(2)    | 31(3)    | 2(2)     | 2(2)     | -7(2)    |
| C(6)  | 16(2)    | 18(2)    | 48(3)    | -11(2)   | -3(2)    | 3(2)     |
| C(7)  | 14(2)    | 20(2)    | 58(4)    | -8(2)    | -4(2)    | 2(2)     |
| C(8)  | 19(2)    | 19(2)    | 70(4)    | -6(2)    | -5(2)    | 2(2)     |
| C(9)  | 25(2)    | 27(3)    | 86(5)    | -23(3)   | -22(3)   | 4(2)     |
| C(10) | 35(3)    | 34(3)    | 64(4)    | -26(3)   | -24(3)   | 14(2)    |
| C(11) | 32(3)    | 24(2)    | 50(4)    | -14(2)   | -9(2)    | 9(2)     |
| C(12) | 27(2)    | 17(2)    | 53(4)    | -1(2)    | 5(2)     | -1(2)    |
| C(13) | 39(3)    | 31(3)    | 75(5)    | 1(3)     | 18(3)    | -4(2)    |
| C(14) | 40(3)    | 26(2)    | 46(4)    | -1(2)    | -1(3)    | 4(2)     |
| C(15) | 78(5)    | 33(3)    | 42(4)    | -14(3)   | -13(4)   | 9(3)     |
| C(16) | 67(5)    | 86(6)    | 50(5)    | 10(4)    | -27(4)   | -26(4)   |
| C(17) | 61(5)    | 72(5)    | 64(5)    | 4(4)     | -6(4)    | 36(4)    |
| C(18) | 12(2)    | 20(2)    | 28(2)    | 5(2)     | -1(2)    | -2(1)    |
| C(19) | 26(2)    | 23(2)    | 29(3)    | 3(2)     | -5(2)    | -4(2)    |
| C(20) | 34(3)    | 29(2)    | 30(3)    | 9(2)     | -12(2)   | -9(2)    |
| C(21) | 25(2)    | 21(2)    | 47(3)    | 3(2)     | -13(2)   | 0(2)     |
| C(22) | 20(2)    | 19(2)    | 41(3)    | 0(2)     | -2(2)    | 2(2)     |
| C(23) | 15(2)    | 16(2)    | 29(3)    | 3(2)     | 0(2)     | -2(1)    |
| C(24) | 53(3)    | 29(3)    | 28(3)    | 2(2)     | -7(3)    | -1(2)    |
| C(25) | 38(3)    | 85(5)    | 37(4)    | -23(3)   | -11(3)   | 14(3)    |
| C(26) | 40(3)    | 51(4)    | 30(3)    | -6(3)    | -2(3)    | -14(3)   |
| C(27) | 24(2)    | 21(2)    | 29(3)    | -2(2)    | 1(2)     | 0(2)     |
| C(28) | 38(3)    | 31(3)    | 27(3)    | -1(2)    | -4(2)    | -3(2)    |
| C(29) | 35(3)    | 34(3)    | 42(3)    | 1(2)     | 11(3)    | 5(2)     |
| C(31) | 17(2)    | 33(2)    | 16(2)    | -5(2)    | -4(2)    | 1(2)     |
| C(32) | 31(3)    | 29(3)    | 67(4)    | -12(3)   | -20(3)   | 6(2)     |
| C(33) | 36(3)    | 46(4)    | 75(5)    | -25(3)   | -24(3)   | 18(3)    |
| C(34) | 22(3)    | 83(5)    | 70(5)    | -32(4)   | -1(3)    | 4(3)     |
| C(35) | 24(2)    | 56(4)    | 30(3)    | 3(3)     | -5(2)    | -7(2)    |
| C(36) | 21(2)    | 32(3)    | 32(3)    | 1(2)     | -5(2)    | 0(2)     |
| C(41) | 9(2)     | 37(3)    | 28(3)    | 6(2)     | -4(2)    | 0(2)     |
| C(42) | 46(4)    | 52(4)    | 42(4)    | 8(3)     | -5(3)    | -20(3)   |
| C(43) | 50(4)    | 51(4)    | 63(5)    | 4(3)     | -26(4)   | -21(3)   |
| C(44) | 28(3)    | 133(8)   | 37(4)    | 20(5)    | 7(3)     | 9(4)     |
| C(45) | 57(4)    | 64(5)    | 51(4)    | -10(3)   | 3(4)     | 24(4)    |
| C(46) | 44(3)    | 34(3)    | 39(3)    | 2(2)     | 2(3)     | 12(2)    |

Table 4: Bond lengths [ $\text{\AA}$ ] for cg\_005m.

|            |          |             |           |
|------------|----------|-------------|-----------|
| Ga(1)-N(1) | 1.950(4) | C(15)-C(17) | 1.530(10) |
| Ga(1)-N(2) | 1.971(4) | C(18)-C(19) | 1.402(7)  |

|             |           |             |           |
|-------------|-----------|-------------|-----------|
| Ga(1)-Te(1) | 2.5586(5) | C(18)-C(23) | 1.411(7)  |
| Ga(1)-Te(2) | 2.6076(6) | C(19)-C(20) | 1.390(7)  |
| Te(1)-C(41) | 2.114(5)  | C(19)-C(24) | 1.509(7)  |
| Te(2)-C(31) | 2.144(4)  | C(20)-C(21) | 1.378(8)  |
| N(1)-C(1)   | 1.342(6)  | C(21)-C(22) | 1.376(8)  |
| N(1)-C(6)   | 1.461(6)  | C(22)-C(23) | 1.399(6)  |
| N(2)-C(3)   | 1.334(5)  | C(23)-C(27) | 1.509(7)  |
| N(2)-C(18)  | 1.453(5)  | C(24)-C(26) | 1.531(8)  |
| C(1)-C(2)   | 1.377(6)  | C(24)-C(25) | 1.539(9)  |
| C(1)-C(4)   | 1.509(6)  | C(27)-C(29) | 1.529(7)  |
| C(2)-C(3)   | 1.406(6)  | C(27)-C(28) | 1.536(7)  |
| C(3)-C(5)   | 1.494(6)  | C(31)-C(36) | 1.389(7)  |
| C(6)-C(7)   | 1.394(8)  | C(31)-C(32) | 1.392(7)  |
| C(6)-C(11)  | 1.401(8)  | C(32)-C(33) | 1.393(8)  |
| C(7)-C(8)   | 1.404(7)  | C(33)-C(34) | 1.348(11) |
| C(7)-C(12)  | 1.506(9)  | C(34)-C(35) | 1.382(10) |
| C(8)-C(9)   | 1.356(9)  | C(35)-C(36) | 1.387(7)  |
| C(9)-C(10)  | 1.370(10) | C(41)-C(42) | 1.366(8)  |
| C(10)-C(11) | 1.402(7)  | C(41)-C(46) | 1.402(8)  |
| C(11)-C(15) | 1.507(9)  | C(42)-C(43) | 1.294(11) |
| C(12)-C(13) | 1.528(8)  | C(43)-C(44) | 1.364(12) |
| C(12)-C(14) | 1.544(7)  | C(44)-C(45) | 1.384(12) |
| C(15)-C(16) | 1.535(11) | C(45)-C(46) | 1.380(9)  |

Table 5: Bond angles [°] for cg\_005m.

|                   |             |                   |          |
|-------------------|-------------|-------------------|----------|
| N(1)-Ga(1)-N(2)   | 97.45(15)   | C(11)-C(15)-C(16) | 112.2(6) |
| N(1)-Ga(1)-Te(1)  | 110.65(11)  | C(17)-C(15)-C(16) | 109.5(6) |
| N(2)-Ga(1)-Te(1)  | 114.06(11)  | C(19)-C(18)-C(23) | 119.8(4) |
| N(1)-Ga(1)-Te(2)  | 110.98(12)  | C(19)-C(18)-N(2)  | 118.9(4) |
| N(2)-Ga(1)-Te(2)  | 109.00(11)  | C(23)-C(18)-N(2)  | 121.3(4) |
| Te(1)-Ga(1)-Te(2) | 113.587(19) | C(20)-C(19)-C(18) | 119.0(5) |
| C(41)-Te(1)-Ga(1) | 94.39(12)   | C(20)-C(19)-C(24) | 119.4(5) |
| C(31)-Te(2)-Ga(1) | 95.44(12)   | C(18)-C(19)-C(24) | 121.6(4) |
| C(1)-N(1)-C(6)    | 118.5(4)    | C(21)-C(20)-C(19) | 121.5(5) |
| C(1)-N(1)-Ga(1)   | 115.8(3)    | C(22)-C(21)-C(20) | 119.8(5) |
| C(6)-N(1)-Ga(1)   | 125.5(3)    | C(21)-C(22)-C(23) | 120.8(5) |
| C(3)-N(2)-C(18)   | 118.9(4)    | C(22)-C(23)-C(18) | 119.1(4) |
| C(3)-N(2)-Ga(1)   | 116.5(3)    | C(22)-C(23)-C(27) | 118.2(4) |
| C(18)-N(2)-Ga(1)  | 124.5(3)    | C(18)-C(23)-C(27) | 122.7(4) |
| N(1)-C(1)-C(2)    | 123.5(4)    | C(19)-C(24)-C(26) | 112.1(5) |
| N(1)-C(1)-C(4)    | 119.3(4)    | C(19)-C(24)-C(25) | 110.9(5) |
| C(2)-C(1)-C(4)    | 117.2(4)    | C(26)-C(24)-C(25) | 110.0(5) |
| C(1)-C(2)-C(3)    | 130.5(4)    | C(23)-C(27)-C(29) | 112.7(4) |
| N(2)-C(3)-C(2)    | 122.7(4)    | C(23)-C(27)-C(28) | 111.9(4) |
| N(2)-C(3)-C(5)    | 120.8(4)    | C(29)-C(27)-C(28) | 108.4(4) |
| C(2)-C(3)-C(5)    | 116.5(4)    | C(36)-C(31)-C(32) | 117.7(4) |
| C(7)-C(6)-C(11)   | 121.4(5)    | C(36)-C(31)-Te(2) | 121.4(3) |
| C(7)-C(6)-N(1)    | 120.6(5)    | C(32)-C(31)-Te(2) | 120.9(4) |
| C(11)-C(6)-N(1)   | 117.9(5)    | C(31)-C(32)-C(33) | 121.2(6) |
| C(6)-C(7)-C(8)    | 117.0(5)    | C(34)-C(33)-C(32) | 119.3(6) |
| C(6)-C(7)-C(12)   | 123.5(4)    | C(33)-C(34)-C(35) | 121.6(5) |
| C(8)-C(7)-C(12)   | 119.5(5)    | C(34)-C(35)-C(36) | 118.9(5) |
| C(9)-C(8)-C(7)    | 122.5(6)    | C(35)-C(36)-C(31) | 121.1(5) |

|                   |          |                   |          |
|-------------------|----------|-------------------|----------|
| C(8)-C(9)-C(10)   | 119.9(5) | C(42)-C(41)-C(46) | 118.6(6) |
| C(9)-C(10)-C(11)  | 120.8(6) | C(42)-C(41)-Te(1) | 121.8(5) |
| C(6)-C(11)-C(10)  | 118.3(6) | C(46)-C(41)-Te(1) | 119.5(4) |
| C(6)-C(11)-C(15)  | 123.3(5) | C(43)-C(42)-C(41) | 118.3(7) |
| C(10)-C(11)-C(15) | 118.5(6) | C(42)-C(43)-C(44) | 126.9(7) |
| C(7)-C(12)-C(13)  | 110.2(5) | C(43)-C(44)-C(45) | 116.6(7) |
| C(7)-C(12)-C(14)  | 112.2(4) | C(46)-C(45)-C(44) | 118.4(7) |
| C(13)-C(12)-C(14) | 109.8(5) | C(45)-C(46)-C(41) | 121.1(6) |
| C(11)-C(15)-C(17) | 112.6(6) |                   |          |

### Compound 3

Table 1: Crystal structure data

| Identification code                                | cg_026m                                                                                                               |
|----------------------------------------------------|-----------------------------------------------------------------------------------------------------------------------|
| Empirical formula                                  | C <sub>35</sub> H <sub>55</sub> Ga N <sub>2</sub> Te                                                                  |
| Formula weight                                     | 701.13                                                                                                                |
| Density (calculated)                               | 1.364 g · cm <sup>-3</sup>                                                                                            |
| <i>F</i> (000)                                     | 1448                                                                                                                  |
| Temperature                                        | 100(1) K                                                                                                              |
| Crystal size                                       | 0.200 × 0.190 × 0.100 mm                                                                                              |
| Crystal colour                                     | pale yellow                                                                                                           |
| Crystal description                                | block                                                                                                                 |
| Wavelength                                         | 0.71073 Å                                                                                                             |
| Crystal system                                     | orthorhombic                                                                                                          |
| Space group                                        | <i>P n m a</i>                                                                                                        |
| Unit cell dimensions                               |                                                                                                                       |
| <i>a</i> [Å]                                       | 16.888(3)                                                                                                             |
| <i>b</i> [Å]                                       | 19.798(3)                                                                                                             |
| <i>c</i> [Å]                                       | 10.2125(15)                                                                                                           |
| $\alpha$ [°]                                       | 90                                                                                                                    |
| $\beta$ [°]                                        | 90                                                                                                                    |
| $\gamma$ [°]                                       | 90                                                                                                                    |
| Volume                                             | 3414.5(9) Å <sup>3</sup>                                                                                              |
| <i>Z</i>                                           | 4                                                                                                                     |
| Cell measurement reflections used                  | 9495                                                                                                                  |
| Cell measurement $\vartheta$ min/max               | 2.244°/33.097°                                                                                                        |
| Diffractometer control software                    | BRUKER D8 KAPPA APEX 2 (3.0-2009)                                                                                     |
| Diffractometer measurement device                  | Bruker D8 KAPPA series II with APEX II area detector system                                                           |
| Diffractometer measurement method                  | Data collection strategy APEX 2/COSMO                                                                                 |
| $\vartheta$ range for data collection              | 2.057°- 33.202°                                                                                                       |
| Completeness to $\vartheta = 25.242^\circ$         | 100.0%                                                                                                                |
| Completeness to $\vartheta_{\max} = 33.202^\circ$  | 99.5%                                                                                                                 |
| Index ranges                                       | -25 ≤ <i>h</i> ≤ 23                                                                                                   |
|                                                    | -30 ≤ <i>k</i> ≤ 26                                                                                                   |
|                                                    | -15 ≤ <i>l</i> ≤ 15                                                                                                   |
| Computing data reduction                           | BRUKER D8 KAPPA APEX 2 (3.0-2009)                                                                                     |
| Absorption coefficient                             | 1.668 mm <sup>-1</sup>                                                                                                |
| Absorption correction                              | Semi-empirical from equivalents                                                                                       |
| Computation absorption correction                  | BRUKER AXS SMART APEX 2 Vers. 3.0-2009                                                                                |
| Max./min. Transmission                             | 0.75/0.63                                                                                                             |
| <i>R</i> <sub>merg</sub> before/after correction   | 0.0779/0.0415                                                                                                         |
| Computing structure solution                       | BRUKER D8 KAPPA APEX 2 (3.0-2009)                                                                                     |
| Computing structure refinement                     | SHELXL-2014/7 (Sheldrick, 2014)                                                                                       |
| Refinement method                                  | Full-matrix least-squares on <i>F</i> <sup>2</sup>                                                                    |
| Reflections collected                              | 77225                                                                                                                 |
| Independent reflections                            | 6666                                                                                                                  |
| <i>R</i> <sub>int</sub>                            | 0.0307                                                                                                                |
| Reflections with <i>I</i> > 2σ( <i>I</i> )         | 5699                                                                                                                  |
| Restraints                                         | 0                                                                                                                     |
| Parameter                                          | 193                                                                                                                   |
| Goof                                               | 1.046                                                                                                                 |
| Weighting details                                  | $w = 1/[\sigma^2(F_{\text{obs}}^2) + (0.0288P)^2 + 1.4412P]$<br>where $P = (F_{\text{obs}}^2 + 2F_{\text{calc}}^2)/3$ |
| <i>R</i> <sub>1</sub> [ <i>I</i> > 2σ( <i>I</i> )] | 0.0225                                                                                                                |



|                              |              |
|------------------------------|--------------|
| $wR_2 [I > 2\sigma(I)]$      | 0.0534       |
| $R_1$ [all data]             | 0.0314       |
| $wR_2$ [all data]            | 0.0578       |
| Absolute structure parameter |              |
| Largest diff. peak and hole  | 0.677/-0.358 |

Table 2: Atomic coordinates ( $\times 10^4$ ) and equivalent isotropic displacement parameters ( $\text{\AA}^2 \times 10^3$ ) for cg\_026m.  $U_{eq}$  is defined as one third of the trace of the orthogonalized  $U_{ij}$  tensor.

|        | <b>x</b> | <b>y</b> | <b>z</b> | <b><math>U_{eq}</math></b> |
|--------|----------|----------|----------|----------------------------|
| Te(1)  | 3342(1)  | 2500     | 6506(1)  | 18(1)                      |
| Ga(2)  | 3842(1)  | 2500     | 4106(1)  | 13(1)                      |
| N(1)   | 3370(1)  | 3239(1)  | 3069(1)  | 14(1)                      |
| C(1)   | 2683(1)  | 3138(1)  | 2458(1)  | 14(1)                      |
| C(2)   | 2330(1)  | 2500     | 2311(2)  | 16(1)                      |
| H(2)   | 1825(13) | 2500     | 1880(20) | 19                         |
| C(3)   | 2250(1)  | 3717(1)  | 1826(1)  | 23(1)                      |
| H(3A)  | 2541     | 4138     | 1986     | 34                         |
| H(3B)  | 1718     | 3753     | 2201     | 34                         |
| H(3C)  | 2211     | 3638     | 881      | 34                         |
| C(4)   | 3746(1)  | 3896(1)  | 2995(1)  | 17(1)                      |
| C(5)   | 3557(1)  | 4402(1)  | 3909(1)  | 21(1)                      |
| C(6)   | 3933(1)  | 5030(1)  | 3792(2)  | 31(1)                      |
| H(6)   | 3807     | 5379     | 4395     | 37                         |
| C(7)   | 4482(1)  | 5151(1)  | 2816(2)  | 33(1)                      |
| H(7)   | 4729     | 5581     | 2751     | 40                         |
| C(8)   | 4671(1)  | 4647(1)  | 1936(1)  | 28(1)                      |
| H(8)   | 5053     | 4732     | 1274     | 34                         |
| C(9)   | 4310(1)  | 4013(1)  | 2001(1)  | 20(1)                      |
| C(10)  | 2962(1)  | 4306(1)  | 5011(1)  | 22(1)                      |
| H(10)  | 2782     | 3825     | 4998     | 27                         |
| C(11)  | 2231(1)  | 4758(1)  | 4821(1)  | 29(1)                      |
| H(11A) | 1872     | 4702     | 5566     | 44                         |
| H(11B) | 1958     | 4630     | 4012     | 44                         |
| H(11C) | 2398     | 5231     | 4764     | 44                         |
| C(12)  | 3345(1)  | 4445(1)  | 6347(1)  | 30(1)                      |
| H(12A) | 3791     | 4136     | 6478     | 45                         |
| H(12B) | 2953     | 4375     | 7042     | 45                         |
| H(12C) | 3534     | 4913     | 6376     | 45                         |
| C(13)  | 4516(1)  | 3485(1)  | 981(1)   | 25(1)                      |
| H(13)  | 4329     | 3037     | 1311     | 30                         |
| C(14)  | 5403(1)  | 3434(1)  | 736(2)   | 50(1)                      |
| H(14A) | 5508     | 3068     | 115      | 75                         |
| H(14B) | 5676     | 3341     | 1563     | 75                         |
| H(14C) | 5596     | 3862     | 371      | 75                         |
| C(15)  | 4096(1)  | 3625(1)  | -309(2)  | 51(1)                      |
| H(15A) | 3522     | 3625     | -167     | 76                         |
| H(15B) | 4233     | 3274     | -945     | 76                         |
| H(15C) | 4261     | 4067     | -645     | 76                         |
| C(16)  | 5019(1)  | 2500     | 4213(2)  | 22(1)                      |
| H(16)  | 5238     | 2500     | 3303     | 26                         |
| C(17)  | 5311(1)  | 1865(1)  | 4920(1)  | 30(1)                      |
| H(17A) | 5888     | 1884     | 5011     | 46                         |
| H(17B) | 5164     | 1464     | 4411     | 46                         |

|        |         |         |         |       |
|--------|---------|---------|---------|-------|
| H(17C) | 5068    | 1840    | 5790    | 46    |
| C(18)  | 2041(1) | 2500    | 6449(2) | 28(1) |
| H(18)  | 1862    | 2500    | 5516    | 34    |
| C(19)  | 1732(1) | 3131(1) | 7122(2) | 40(1) |
| H(19A) | 1152    | 3116    | 7156    | 61    |
| H(19B) | 1900    | 3531    | 6630    | 61    |
| H(19C) | 1944    | 3154    | 8014    | 61    |

Table 3: Anisotropic displacement parameters ( $\text{\AA}^2 \times 10^3$ ) for cg\_026m. The anisotropic displacement factor exponent takes the form:  $-2\pi^2[h^2a^*U_{11} + \dots + 2hka^*b^*U_{12}]$

|       | $U_{11}$ | $U_{22}$ | $U_{33}$ | $U_{23}$ | $U_{13}$ | $U_{12}$ |
|-------|----------|----------|----------|----------|----------|----------|
| Te(1) | 20(1)    | 23(1)    | 12(1)    | 0        | -1(1)    | 0        |
| Ga(2) | 12(1)    | 14(1)    | 12(1)    | 0        | -2(1)    | 0        |
| N(1)  | 14(1)    | 13(1)    | 14(1)    | 0(1)     | -2(1)    | -1(1)    |
| C(1)  | 15(1)    | 14(1)    | 14(1)    | 1(1)     | -1(1)    | 1(1)     |
| C(2)  | 14(1)    | 13(1)    | 20(1)    | 0        | -3(1)    | 0        |
| C(3)  | 23(1)    | 14(1)    | 31(1)    | 4(1)     | -10(1)   | -1(1)    |
| C(4)  | 18(1)    | 13(1)    | 18(1)    | 1(1)     | -4(1)    | -3(1)    |
| C(5)  | 26(1)    | 16(1)    | 22(1)    | -2(1)    | -4(1)    | -4(1)    |
| C(6)  | 39(1)    | 19(1)    | 34(1)    | -6(1)    | -4(1)    | -9(1)    |
| C(7)  | 37(1)    | 21(1)    | 41(1)    | 1(1)     | -3(1)    | -15(1)   |
| C(8)  | 27(1)    | 24(1)    | 34(1)    | 5(1)     | 0(1)     | -9(1)    |
| C(9)  | 20(1)    | 18(1)    | 23(1)    | 3(1)     | -1(1)    | -4(1)    |
| C(10) | 30(1)    | 18(1)    | 20(1)    | -5(1)    | -2(1)    | 0(1)     |
| C(11) | 33(1)    | 24(1)    | 31(1)    | -5(1)    | -2(1)    | 4(1)     |
| C(12) | 40(1)    | 24(1)    | 24(1)    | -8(1)    | -6(1)    | 4(1)     |
| C(13) | 27(1)    | 20(1)    | 29(1)    | 3(1)     | 9(1)     | -2(1)    |
| C(14) | 31(1)    | 72(1)    | 47(1)    | -7(1)    | 14(1)    | 6(1)     |
| C(15) | 54(1)    | 58(1)    | 41(1)    | -25(1)   | -14(1)   | 8(1)     |
| C(16) | 13(1)    | 35(1)    | 17(1)    | 0        | -2(1)    | 0        |
| C(17) | 21(1)    | 39(1)    | 31(1)    | 0(1)     | -7(1)    | 10(1)    |
| C(18) | 20(1)    | 44(1)    | 20(1)    | 0        | 4(1)     | 0        |
| C(19) | 30(1)    | 51(1)    | 40(1)    | 2(1)     | 12(1)    | 10(1)    |

Table 4: Bond lengths [ $\text{\AA}$ ] for cg\_026m.

|              |            |               |            |
|--------------|------------|---------------|------------|
| Te(1)-C(18)  | 2.1983(19) | C(5)-C(10)    | 1.5209(18) |
| Te(1)-Ga(2)  | 2.5929(4)  | C(6)-C(7)     | 1.383(2)   |
| Ga(2)-N(1)   | 1.9739(10) | C(7)-C(8)     | 1.381(2)   |
| Ga(2)-N(1)#1 | 1.9739(10) | C(8)-C(9)     | 1.3970(17) |
| Ga(2)-C(16)  | 1.9902(17) | C(9)-C(13)    | 1.5162(18) |
| N(1)-C(1)    | 1.3321(13) | C(10)-C(12)   | 1.5353(18) |
| N(1)-C(4)    | 1.4502(14) | C(10)-C(11)   | 1.5366(19) |
| C(1)-C(2)    | 1.4044(13) | C(13)-C(15)   | 1.521(2)   |
| C(1)-C(3)    | 1.5059(16) | C(13)-C(14)   | 1.523(2)   |
| C(2)-C(1)#1  | 1.4044(13) | C(16)-C(17)   | 1.5313(17) |
| C(4)-C(5)    | 1.4050(17) | C(16)-C(17)#1 | 1.5313(17) |
| C(4)-C(9)    | 1.4108(16) | C(18)-C(19)   | 1.519(2)   |
| C(5)-C(6)    | 1.4001(18) | C(18)-C(19)#1 | 1.519(2)   |

#1 x,-y+1/2,z

Table 5: Bond angles [°] for cg\_026m.

|                    |            |                     |            |
|--------------------|------------|---------------------|------------|
| C(18)-Te(1)-Ga(2)  | 107.47(5)  | C(4)-C(5)-C(10)     | 123.54(11) |
| N(1)-Ga(2)-N(1)#1  | 95.66(5)   | C(7)-C(6)-C(5)      | 121.35(13) |
| N(1)-Ga(2)-C(16)   | 115.64(4)  | C(8)-C(7)-C(6)      | 119.86(13) |
| N(1)#1-Ga(2)-C(16) | 115.64(4)  | C(7)-C(8)-C(9)      | 121.18(13) |
| N(1)-Ga(2)-Te(1)   | 112.07(3)  | C(8)-C(9)-C(4)      | 118.41(12) |
| N(1)#1-Ga(2)-Te(1) | 112.07(3)  | C(8)-C(9)-C(13)     | 119.09(11) |
| C(16)-Ga(2)-Te(1)  | 105.84(5)  | C(4)-C(9)-C(13)     | 122.46(11) |
| C(1)-N(1)-C(4)     | 119.45(9)  | C(5)-C(10)-C(12)    | 110.91(11) |
| C(1)-N(1)-Ga(2)    | 119.41(8)  | C(5)-C(10)-C(11)    | 111.40(11) |
| C(4)-N(1)-Ga(2)    | 121.11(7)  | C(12)-C(10)-C(11)   | 110.22(10) |
| N(1)-C(1)-C(2)     | 123.73(11) | C(9)-C(13)-C(15)    | 111.21(12) |
| N(1)-C(1)-C(3)     | 120.57(10) | C(9)-C(13)-C(14)    | 112.61(13) |
| C(2)-C(1)-C(3)     | 115.66(10) | C(15)-C(13)-C(14)   | 109.20(14) |
| C(1)-C(2)-C(1)#1   | 128.03(14) | C(17)-C(16)-C(17)#1 | 110.34(15) |
| C(5)-C(4)-C(9)     | 120.98(11) | C(17)-C(16)-Ga(2)   | 110.35(9)  |
| C(5)-C(4)-N(1)     | 120.35(10) | C(17)#1-C(16)-Ga(2) | 110.35(9)  |
| C(9)-C(4)-N(1)     | 118.66(10) | C(19)-C(18)-C(19)#1 | 110.74(17) |
| C(6)-C(5)-C(4)     | 118.20(12) | C(19)-C(18)-Te(1)   | 109.38(10) |
| C(6)-C(5)-C(10)    | 118.26(12) | C(19)#1-C(18)-Te(1) | 109.38(10) |

#1 x,-y+1/2,z
